# Supplementary material for: Elsholtzia bodinieri Vaniot Ameliorated Acute Lung Injury by NQO1, BCL2 and PTGS2 In Silico and In Vitro Analyses
Source: MDPI journal article supplement (doi:10.3390/ijms232415651), 2022-12-09
Supplement: s1 [file s1]

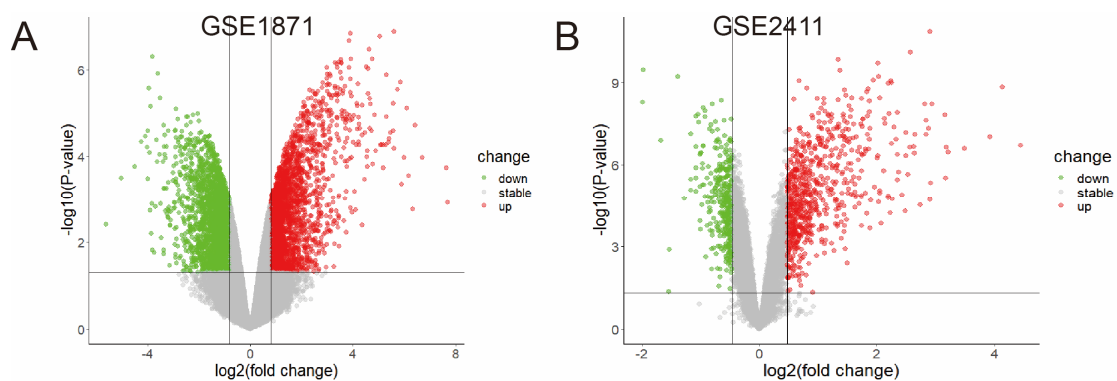

**Figure S1.** Transcriptomic differentially expressed genes of ALI (related to Fig. 1). (A) Volcano plot showing DEGs between ALI and normal lung tissue in GSE1871 dataset. (B) Volcano plot showing DEGs between ALI and normal lung tissue in GSE2411 dataset. There red dots indicate upregulated genes, green dots indicate downregulated genes, and gray dots indicate stable genes (corrected P values <0.05).

**Table S1.** Compounds of *E. bodinieri* Vaniot. 97 compounds of *E. bodinieri* Vaniot were retrieved in CAS SciFinder database and PubChem database.

| Compound                               | Molecular Formula                               | Molecular Weight | CAS ID       | Reference                                         |
|----------------------------------------|-------------------------------------------------|------------------|--------------|---------------------------------------------------|
| Cynaroside                             | C <sub>21</sub> H <sub>20</sub> O <sub>11</sub> | 448.4            | 5373/11/5    | DOI:10.1177/1934578x1801301122                    |
| 5Z-Dodecenyl Acetate                   | C <sub>14</sub> H <sub>26</sub> O <sub>2</sub>  | 226.35           | 16676-96-3   | DOI:CNKI:SUN:SPYK.0.2020-04-035(Chinese)          |
| P-Cymen-8-Ol                           | C <sub>10</sub> H <sub>14</sub> O               | 150.22           | 1197-01-9    | DOI:10.1080/14786419.2017.1395436                 |
| Vinyl Amyl Carbinol                    | C <sub>8</sub> H <sub>16</sub> O                | 128.21           | 3391-86-4    | DOI:10.3969/j.issn.1007-855x.2010.01.018(Chinese) |
| (+)-Carotol                            | C <sub>15</sub> H <sub>26</sub> O               | 222.37           | 465-28-1     | DOI:CNKI:SUN:SPYK.0.2020-04-035(Chinese)          |
| (+/-)-Eriodictyol                      | C <sub>15</sub> H <sub>12</sub> O <sub>6</sub>  | 288.25           | 552-58-9     | DOI:CNKI:CDMD:1.1015.528521(Chinese)              |
| (1R,2R,4R)-Trihydroxy-p-menthane       | C <sub>10</sub> H <sub>20</sub> O <sub>3</sub>  | 188.26           | 2514-94-5    | DOI:10.3969/j.issn.1007-855x.2013.05.013(Chinese) |
| 1-Carvone                              | C <sub>10</sub> H <sub>14</sub> O               | 150.22           | 2244-16-8    | DOI:10.3969/j.issn.1007-855x.2010.01.018(Chinese) |
| 1,8-Cineole                            | C <sub>10</sub> H <sub>18</sub> O               | 154.25           | 470-82-6     | DOI:CNKI:SUN:SPYK.0.2020-04-035(Chinese)          |
| 2- Dodecenal                           | C <sub>12</sub> H <sub>22</sub> O               | 182.3            | 4826-62-4    | DOI:CNKI:SUN:SPYK.0.2020-04-035(Chinese)          |
| 2-Pinene                               | C <sub>10</sub> H <sub>16</sub>                 | 136.23           | 80-56-8      | DOI:10.3969/j.issn.1007-855x.2010.01.018(Chinese) |
| 2α,19α-Dihydroxyursolic acid           | C <sub>30</sub> H <sub>48</sub> O <sub>5</sub>  | 488.7            | 13850-16-3   | DOI:10.1002/hlca.200590006                        |
| 3-cyclohexene-1-methanol               | C <sub>10</sub> H <sub>18</sub> O               | 154.25           | 98-55-5      | DOI:10.3969/j.issn.1007-855x.2010.01.018(Chinese) |
| 3,4-Dihydroxy-5-Methoxybenzaldehyde    | C <sub>8</sub> H <sub>8</sub> O <sub>4</sub>    | 168.15           | 3934-87-0    | DOI:10.3969/j.issn.1007-855x.2013.05.013(Chinese) |
| 3,7-dimethylocta-2,6-dienyl propanoate | C <sub>13</sub> H <sub>22</sub> O <sub>2</sub>  | 210.31           | 152481-48-6  | DOI:10.3969/j.issn.1007-855x.2010.01.018(Chinese) |
| 4-Isopropylbenzaldehyde                | C <sub>10</sub> H <sub>12</sub> O               | 148.2            | 122-03-2     | DOI:10.3969/j.issn.1007-855x.2010.01.018(Chinese) |
| 4-Isopropylbenzyl alcohol              | C <sub>10</sub> H <sub>14</sub> O               | 150.22           | 536-60-7     | DOI:10.1007/s00217-021-03829-4                    |
| Acacetin                               | C <sub>16</sub> H <sub>12</sub> O <sub>5</sub>  | 284.26           | 480-44-4     | DOI:10.13467/j.cnki.jbuns.2006.03.009(Chinese)    |
| alpha-Caryophyllene                    | C <sub>15</sub> H <sub>24</sub>                 | 204.35           | 6753-98-6    | DOI:10.3969/j.issn.1007-855x.2010.01.018(Chinese) |
| alpha-Humulene                         | C <sub>15</sub> H <sub>24</sub>                 | 204.35           | 6753-98-6    | DOI:10.3969/j.issn.1007-855x.2010.01.018(Chinese) |
| alpha-Muurolene                        | C <sub>15</sub> H <sub>24</sub>                 | 204.35           | 10208-80-7   | DOI:CNKI:SUN:SPYK.0.2020-04-035(Chinese)          |
| ALPHA-PINENE                           | C <sub>10</sub> H <sub>16</sub>                 | 136.23           | 80-56-8      | DOI:10.3969/j.issn.1007-855x.2010.01.018(Chinese) |
| Amentoflavone                          | C <sub>30</sub> H <sub>18</sub> O <sub>10</sub> | 538.5            | 1617-53-4    | DOI:10.13863/j.issn1001-4454.2005.02.009(Chinese) |
| Apigenin                               | C <sub>15</sub> H <sub>10</sub> O <sub>5</sub>  | 270.24           | 520-36-5     | DOI:10.1248/cpb.56.592                            |
| Arachidic acid                         | C <sub>20</sub> H <sub>40</sub> O <sub>2</sub>  | 312.5            | 506-30-9     | DOI:10.3321/j.issn:1673-1689.2008.02.013(Chinese) |
| beta-Caryophyllene                     | C <sub>15</sub> H <sub>24</sub>                 | 204.35           | 87-44-5      | DOI:10.3969/j.issn.1007-855x.2010.01.018(Chinese) |
| BETA-TERPINEOL                         | C <sub>10</sub> H <sub>18</sub> O               | 154.25           | 138-87-4     | DOI:CNKI:SUN:CYKX.0.2007-08-008(Chinese)          |
| Bicyclo[3,1,1]heptan-3-ol              | C <sub>10</sub> H <sub>16</sub> O               | 152.23           | 1674-08-4    | DOI:10.3969/j.issn.1007-855x.2010.01.018(Chinese) |
| Bodinoside A                           | C <sub>36</sub> H <sub>58</sub> O <sub>12</sub> | 682.8            | 851120-60-0  | DOI:10.1002/hlca.200590006                        |
| Bodinoside B                           | C <sub>36</sub> H <sub>58</sub> O <sub>11</sub> | 666.8            | 851120-62-2  | DOI:10.1002/hlca.200590006                        |
| Bornyl acetate                         | C <sub>12</sub> H <sub>20</sub> O <sub>2</sub>  | 196.29           | 5655-61-8    | DOI:10.3969/j.issn.1007-855x.2010.01.018(Chinese) |
| caffeic acid                           | C <sub>9</sub> H <sub>8</sub> O <sub>4</sub>    | 180.16           | 331-39-5     | DOI:10.3969/j.issn.1007-855x.2013.05.013(Chinese) |
| Carotol                                | C <sub>15</sub> H <sub>26</sub> O               | 222.37           | 465-28-1     | DOI:CNKI:SUN:SPYK.0.2020-04-035(Chinese)          |
| Carvone Hydrate                        | C <sub>10</sub> H <sub>18</sub> O <sub>3</sub>  | 186.25           | 60593-11-5   | DOI:CNKI:CDMD:1.1015.528521(Chinese)              |
| Caryophyllene                          | C <sub>15</sub> H <sub>24</sub>                 | 204.35           | 87-44-5      | DOI:10.3969/j.issn.1007-855x.2010.01.018(Chinese) |
| Caryophyllene oxide                    | C <sub>15</sub> H <sub>24</sub> O               | 220.35           | 1139-30-6    | DOI:10.3969/j.issn.1007-855x.2010.01.018(Chinese) |
| CAS 1038743-23-5                       | C <sub>31</sub> H <sub>30</sub> O <sub>14</sub> | 626.6            | 1038743-23-5 | DOI:10.1248/cpb.56.592                            |
| Chrysin                                | C <sub>15</sub> H <sub>10</sub> O <sub>4</sub>  | 254.24           | 480-40-0     | DOI:10.1248/cpb.56.592                            |

|                                                      |                                                 |         |             |                                                    |
|------------------------------------------------------|-------------------------------------------------|---------|-------------|----------------------------------------------------|
| Cineole                                              | C <sub>10</sub> H <sub>18</sub> O               | 154.25  | 470-82-6    | DOI:CNKI:SUN:SPYK.0.2020-04-035(Chinese)           |
| Coleonic acid                                        | C <sub>30</sub> H <sub>46</sub> O <sub>4</sub>  | 470.7   | 128397-09-1 | DOI:10.1002/hlca.200590006                         |
| Cosmosiine                                           | C <sub>21</sub> H <sub>20</sub> O <sub>10</sub> | 432.4   | 578-74-5    | DOI:10.1080/14786419.2016.1164698                  |
| Cyclohexane                                          | C <sub>6</sub> H <sub>12</sub>                  | 84.16   | 110-82-7    | DOI:10.3969/j.issn.1007-855x.2010.01.018(Chinese)  |
| D-Myrtenal                                           | C <sub>10</sub> H <sub>14</sub> O               | 150.22  | 564-94-3    | DOI:10.3969/j.issn.1007-855x.2010.01.018(Chinese)  |
| Daucosterol                                          | C <sub>35</sub> H <sub>60</sub> O <sub>6</sub>  | 576.8   | 474-58-8    | DOI:10.13863/j.issn1001-4454.2005.02.009(Chinese)  |
| Decanoic acid                                        | C <sub>10</sub> H <sub>20</sub> O <sub>2</sub>  | 172.26  | 334-48-5    | DOI:CNKI:SUN:SPYK.0.2020-04-035(Chinese)           |
| Decyl acetate                                        | C <sub>12</sub> H <sub>24</sub> O <sub>2</sub>  | 200.32  | 112-17-4    | DOI:CNKI:SUN:SPYK.0.2020-04-035(Chinese)           |
| Dimethyl 2-methylene<br>bicyclo-[2.2.1] heptan-3-one | C <sub>10</sub> H <sub>14</sub> O               | 150.22  | 19890-00-7  | DOI:10.3969/j.issn.1007-855x.2010.01.018(Chinese)  |
| DL-Catechin                                          | C <sub>15</sub> H <sub>14</sub> O <sub>6</sub>  | 290.27  | 154-23-4    | DOI:10.1080/10408690390826464                      |
| Durenol                                              | C <sub>10</sub> H <sub>14</sub> O               | 150.22  | 527-35-5    | DOI:10.7506/spkx1002-6630-201402045(Chinese)       |
| Fenchol                                              | C <sub>10</sub> H <sub>18</sub> O               | 154.25  | 1632-73-1   | DOI:10.3969/j.issn.1007-855x.2010.01.018(Chinese)  |
| Gallic acid                                          | C <sub>7</sub> H <sub>6</sub> O <sub>5</sub>    | 170.12  | 149-91-7    | DOI:10.3321/j.issn:0253-2670.2007.03.003(Chinese)  |
| Gallocatechol                                        | C <sub>15</sub> H <sub>14</sub> O <sub>7</sub>  | 306.27  | 970-73-0    | DOI:10.13467/j.cnki.jbuns.2006.03.009(Chinese)     |
| Geranyl acetate                                      | C <sub>12</sub> H <sub>20</sub> O <sub>2</sub>  | 196.29  | 105-87-3    | DOI:10.3969/j.issn.1007-855x.2010.01.018(Chinese)  |
| Globulol                                             | C <sub>15</sub> H <sub>26</sub> O               | 222.37  | 489-41-8    | DOI:10.3969/j.issn.1007-855x.2010.01.018(Chinese)  |
| Icariside E4                                         | C <sub>26</sub> H <sub>34</sub> O <sub>10</sub> | 506.5   | 126253-42-7 | DOI:CNKI:CDMD:1.1015.528521(Chinese)               |
| Kaempferol                                           | C <sub>15</sub> H <sub>10</sub> O <sub>6</sub>  | 286.24  | 520-18-3    | DOI:10.3321/j.issn:0253-2670.2007.03.003(Chinese)  |
| L-Alpha-Cadinol                                      | C <sub>15</sub> H <sub>26</sub> O               | 222.37  | 481-34-5    | DOI:10.11842/wst.20190307002(Chinese)              |
| L-Carveol                                            | C <sub>10</sub> H <sub>16</sub> O               | 152.23  | 99-48-9     | DOI:10.3969/j.issn.1007-855x.2010.01.018(Chinese)  |
| Ledol                                                | C <sub>15</sub> H <sub>26</sub> O               | 222.37  | 577-27-5    | DOI:10.3969/j.issn.1007-855x.2010.01.018(Chinese)  |
| Limonene                                             | C <sub>10</sub> H <sub>16</sub>                 | 136.23  | 138-86-3    | DOI:10.13863/j.issn1001-4454.2020.04.020(Chinese)  |
| Linalool                                             | C <sub>10</sub> H <sub>18</sub> O               | 154.25  | 78-70-6     | DOI:CNKI:SUN:SPYK.0.2020-04-035(Chinese)           |
| Luteolin                                             | C <sub>15</sub> H <sub>10</sub> O <sub>6</sub>  | 286.24  | 491-70-3    | DOI:10.1080/14786419.2016.1164698                  |
| Luteolin 7-(6"-ferulyl)glucoside)                    | C <sub>31</sub> H <sub>28</sub> O <sub>14</sub> | 624.5   | 98767-38-5  | DOI:10.1248/cpb.56.592                             |
| m-alpha-Terpineol, acetate                           | C <sub>12</sub> H <sub>20</sub> O <sub>2</sub>  | 196.29  | 80-26-2     | DOI:CNKI:SUN:SPYK.0.2020-04-035(Chinese)           |
| Maslinic acid                                        | C <sub>30</sub> H <sub>48</sub> O <sub>4</sub>  | 472.7   | 4373-41-5   | DOI:10.1080/14786419.2016.1164698                  |
| Methyl caffeate                                      | C <sub>10</sub> H <sub>10</sub> O <sub>4</sub>  | 194.18  | 3843-74-1   | DOI:CNKI:CDMD:1.1015.528521(Chinese)               |
| Methyl geranate                                      | C <sub>11</sub> H <sub>18</sub> O <sub>2</sub>  | 182.26  | 1189-09-9   | DOI:CNKI:SUN:SPYK.0.2020-04-035(Chinese)           |
| Miscanthoside                                        | C <sub>21</sub> H <sub>22</sub> O <sub>11</sub> | 450.4   | 38965-51-4  | DOI:10.7523/j.issn.2095-6134.2008.4.020(Chinese)   |
| Myrtenol                                             | C <sub>10</sub> H <sub>16</sub> O               | 152.23  | 515-00-4    | DOI:10.13863/j.issn1001-4454.2020.04.020(Chinese)  |
| Naphthalene                                          | C <sub>10</sub> H <sub>8</sub>                  | 128.169 | 91-20-3     | DOI:10.13989/j.cnki.0517-6611.2010.10.155(Chinese) |
| Nepetoidin B                                         | C <sub>17</sub> H <sub>14</sub> O <sub>6</sub>  | 314.29  | 55486-06-1  | DOI: 10.1080/14786419.2016.1164698                 |
| Nerol                                                | C <sub>10</sub> H <sub>18</sub> O               | 154.25  | 106-25-2    | DOI:CNKI:SUN:SPYK.0.2020-04-035(Chinese)           |
| Neryl Acetate                                        | C <sub>12</sub> H <sub>20</sub> O <sub>2</sub>  | 196.29  | 141-12-8    | DOI:CNKI:SUN:SPYK.0.2020-04-035(Chinese)           |
| O-CYMENE                                             | C <sub>10</sub> H <sub>14</sub>                 | 134.22  | 527-84-4    | DOI:10.13989/j.cnki.0517-6611.2009.18.094(Chinese) |
| Oblonganoside I                                      | C <sub>41</sub> H <sub>66</sub> O <sub>14</sub> | 783     |             | DOI: 10.1080/14786419.2018.1477144                 |
| Oleanolic acid                                       | C <sub>30</sub> H <sub>48</sub> O <sub>3</sub>  | 456.7   | 508-02-1    | DOI: 10.1080/14786419.2016.1164698                 |
| Palmitic Acid                                        | C <sub>16</sub> H <sub>32</sub> O <sub>2</sub>  | 256.42  | 57-10-3     | DOI:CNKI:SUN:SPYK.0.2020-04-035(Chinese)           |
| Perillyl acetate                                     | C <sub>12</sub> H <sub>18</sub> O <sub>2</sub>  | 194.27  | 15111-96-3  | DOI:CNKI:SUN:SPYK.0.2020-04-035(Chinese)           |
| Perillyl alcohol                                     | C <sub>10</sub> H <sub>16</sub> O               | 152.23  | 536-59-4    | DOI:CNKI:SUN:SPYK.0.2020-04-035(Chinese)           |
| PHYTONE                                              | C <sub>18</sub> H <sub>36</sub> O               | 268.5   | 502-69-2    | DOI:CNKI:SUN:SPYK.0.2020-04-035(Chinese)           |
| Protocatechualdehyde                                 | C <sub>7</sub> H <sub>6</sub> O <sub>3</sub>    | 138.12  | 139-85-5    | DOI:10.3969/j.issn.1007-855x.2013.05.013(Chinese)  |

|                              |                                                 |        |             |                                                   |
|------------------------------|-------------------------------------------------|--------|-------------|---------------------------------------------------|
| PubChem CID 21637755         | C <sub>42</sub> H <sub>68</sub> O <sub>16</sub> | 829    |             | DOI: 10.1080/14786419.2018.1477144                |
| Quercetin                    | C <sub>15</sub> H <sub>10</sub> O <sub>7</sub>  | 302.23 | 117-39-5    | DOI:10.13467/j.cnki.jbuns.2006.03.009(Chinese)    |
| Rosmarinic acid              | C <sub>18</sub> H <sub>16</sub> O <sub>8</sub>  | 360.3  | 20283-92-5  | DOI:10.3969/j.issn.1007-855x.2013.05.013(Chinese) |
| Rosmarinic acid ethyl ester  | C <sub>20</sub> H <sub>20</sub> O <sub>8</sub>  | 388.4  | 174591-47-0 | DOI:10.3969/j.issn.1007-855x.2013.05.013(Chinese) |
| Rosmarinic acid methyl ester | C <sub>19</sub> H <sub>18</sub> O <sub>8</sub>  | 374.3  | 99353-00-1  | DOI:10.3969/j.issn.1007-855x.2013.05.013(Chinese) |
| Rotungenoside                | C <sub>36</sub> H <sub>58</sub> O <sub>10</sub> | 650    | 121387-38-0 | DOI:10.1080/14786419.2018.1477144                 |
| Spathulenol                  | C <sub>15</sub> H <sub>24</sub> O               | 220.35 | 6750-60-3   | DOI:10.3969/j.issn.1007-855x.2010.01.018(Chinese) |
| Terpinen-4-ol                | C <sub>10</sub> H <sub>18</sub> O               | 154.25 | 562-74-3    | DOI:10.3969/j.issn.1007-855x.2010.01.018(Chinese) |
| Terpineol                    | C <sub>10</sub> H <sub>18</sub> O               | 154.25 | 98-55-5     | DOI:CNKI:SUN:SPYK.0.2020-04-035(Chinese)          |
| Terpinyl Acetate             | C <sub>12</sub> H <sub>20</sub> O <sub>2</sub>  | 196.29 | 80-26-2     | DOI:CNKI:SUN:SPYK.0.2020-04-035(Chinese)          |
| Thymol                       | C <sub>10</sub> H <sub>14</sub> O               | 150.22 | 89-83-8     | DOI:CNKI:SUN:CYKX.0.2007-08-008(Chinese)          |
| Torreyol                     | C <sub>15</sub> H <sub>26</sub> O               | 222.37 | 19435-97-3  | DOI:CNKI:SUN:SPYK.0.2020-04-035(Chinese)          |
| Tricin                       | C <sub>17</sub> H <sub>14</sub> O <sub>7</sub>  | 330.29 | 520-32-1    | DOI:10.13467/j.cnki.jbuns.2006.03.009(Chinese)    |
| Vanillin                     | C <sub>8</sub> H <sub>8</sub> O <sub>3</sub>    | 152.15 | 121-33-5    | DOI:10.3321/j.issn:0253-2670.2007.03.003(Chinese) |
| VERBENOL                     | C <sub>10</sub> H <sub>16</sub> O               | 152.23 | 473-67-6    | DOI:10.3969/j.issn.1007-855x.2010.01.018(Chinese) |
| β-sitosterol                 | C <sub>29</sub> H <sub>50</sub> O               | 414.7  | 83-46-5     | DOI:10.13863/j.issn1001-4454.2005.02.009(Chinese) |

**Table S2.** Potential molecular targets of compounds in *E. bodinieri* Vaniot. In Swiss Target Prediction database, 637 potential molecular targets of 97 compounds were collected.

| Compound                               | Target Gene | Uniprot ID | ChEMBL ID     | Probability* | Known actives<br>(3D/2D) |
|----------------------------------------|-------------|------------|---------------|--------------|--------------------------|
| Methyl caffeate                        | ABAT        | P80404     | CHEMBL2044    | 0.031227     | 3 / 0                    |
| Cosmosiine                             | ABCB1       | P08183     | CHEMBL4302    | 0.118883     | 0 / 44                   |
| CAS 1038743-23-5                       | ABCC1       | P33527     | CHEMBL3004    | 0.055648     | 6 / 0                    |
| Geranyl acetate                        | ABCC9       | O60706     | CHEMBL1971    | 0.031227     | 2 / 0                    |
| CAS 1038743-23-5                       | ABCG2       | Q9UNQ0     | CHEMBL5393    | 0.055648     | 0 / 11                   |
| Geranyl acetate                        | ABHD6       | Q9BV23     | CHEMBL2189127 | 0.031227     | 5 / 0                    |
| Gallocatechol                          | ABL1        | P00519     | CHEMBL1862    | 0.101614     | 142 / 0                  |
| Phytone                                | ACACA       | Q13085     | CHEMBL3351    | 0.112042     | 75 / 0                   |
| Phytone                                | ACACB       | O00763     | CHEMBL4829    | 0.112042     | 262 / 0                  |
| Coleonolic acid                        | ACE         | P12821     | CHEMBL1808    | 0.120226     | 223 / 0                  |
| 3,4-Dihydroxy-5-methoxybenzaldehyde    | ACHE        | P22303     | CHEMBL220     | 0.125076     | 5 / 0                    |
| Carvone Hydrate                        | ACP1        | P24666     | CHEMBL4903    | 0.125076     | 0 / 1                    |
| Vinyl Amyl Carbinol                    | ACPP        | P15309     | CHEMBL2633    | 0.023833     | 6 / 0                    |
| Rosmarinic acid ethyl ester            | ADAM17      | P78536     | CHEMBL3706    | 0.115737     | 386 / 0                  |
| 2- Dodecenal                           | ADH1A       | P07327     | CHEMBL1970    | 0.071787     | 10 / 0                   |
| D-Myrtenal                             | ADH1B       | P00325     | CHEMBL3284    | 0.043919     | 7 / 0                    |
| 2- Dodecenal                           | ADH1C       | P00326     | CHEMBL3285    | 0.071787     | 3 / 0                    |
| 4-Isopropylbenzaldehyde                | ADH4        | P08319     | CHEMBL2990    | 0.053518     | 1 / 0                    |
| Rosmarinic acid                        | ADK         | P55263     | CHEMBL3589    | 0.10934      | 45 / 0                   |
| Cosmosiine                             | ADORA1      | P30542     | CHEMBL226     | 0.215357     | 45 / 1                   |
| CAS 1038743-23-5                       | ADORA2A     | P29274     | CHEMBL251     | 0.055648     | 33 / 1                   |
| Daucosterol                            | ADORA2B     | P29275     | CHEMBL255     | 0.074392     | 6 / 0                    |
| Carvone Hydrate                        | ADORA3      | P0DMS8     | CHEMBL256     | 0.125076     | 0 / 3                    |
| 3,7-Dimethylocta-2,6-dienyl propanoate | ADRA1A      | P35348     | CHEMBL229     | 0.042894     | 1 / 0                    |
| Geranyl acetate                        | ADRA1D      | P25100     | CHEMBL223     | 0.031227     | 20 / 0                   |
| Decyl acetate                          | ADRA2A      | P08913     | CHEMBL1867    | 0.031227     | 21 / 0                   |
| Terpinyl Acetate                       | ADRA2B      | P18089     | CHEMBL1942    | 0.031227     | 19 / 0                   |
| Cosmosiine                             | ADRA2C      | P18825     | CHEMBL1916    | 0.118883     | 19 / 0                   |
| Coleonolic acid                        | AGTR1       | P30556     | CHEMBL227     | 0.120226     | 123 / 0                  |
| Maslinic acid                          | AGTR2       | P50052     | CHEMBL4607    | 0.120226     | 17 / 0                   |
| Apigenin                               | AHR         | P35869     | CHEMBL3201    | 0.272563     | 1 / 1                    |
| Kaempferol                             | AKR1A1      | P14550     | CHEMBL2246    | 0.402643     | 1 / 1                    |
| Caffeic acid                           | AKR1B1      | P15121     | CHEMBL1900    | 0.150924     | 23 / 30                  |
| Carvone Hydrate                        | AKR1B10     | O60218     | CHEMBL5983    | 0.166646     | 0 / 6                    |
| 5Z-Dodecenyl Acetate                   | AKR1C1      | Q04828     | CHEMBL5905    | 0.060425     | 0 / 1                    |
| 5Z-Dodecenyl Acetate                   | AKR1C2      | P52895     | CHEMBL5847    | 0.060425     | 0 / 1                    |
| Rosmarinic acid                        | AKR1C3      | P42330     | CHEMBL4681    | 0.10934      | 2 / 20                   |
| Caffeic acid                           | AKR1C4      | P17516     | CHEMBL4999    | 0.071787     | 0 / 1                    |
| Apigenin                               | AKT1        | P31749     | CHEMBL4282    | 0.108771     | 0 / 16                   |
| Thymol                                 | ALB         | P02768     | CHEMBL3253    | 0.043919     | 0 / 5                    |

|                                                |         |        |               |          |         |
|------------------------------------------------|---------|--------|---------------|----------|---------|
| Geranyl acetate                                | ALDH1A1 | P00352 | CHEMBL3577    | 0.031227 | 10 / 0  |
| Cosmosiine                                     | ALDH2   | P05091 | CHEMBL1935    | 0.118883 | 10 / 0  |
| Geranyl acetate                                | ALDH3A1 | P30838 | CHEMBL3578    | 0.031227 | 5 / 0   |
| Methyl caffeate                                | ALDH5A1 | P51649 | CHEMBL1911    | 0.031227 | 1 / 0   |
| Gallic acid                                    | ALK     | Q9UM73 | CHEMBL4247    | 0.125076 | 0 / 3   |
| Apigenin                                       | ALOX12  | P18054 | CHEMBL3687    | 0.47744  | 1 / 0   |
| Rosmarinic acid ethyl ester                    | ALOX15  | P16050 | CHEMBL2903    | 0.115737 | 17 / 0  |
| Carvone Hydrate                                | ALOX5   | P09917 | CHEMBL215     | 0.116739 | 13 / 20 |
| Rosmarinic acid ethyl ester                    | ALOX5AP | P20292 | CHEMBL4550    | 0.115737 | 164 / 0 |
| Vanillin                                       | ALPG    | P10696 | CHEMBL3402    | 0.043919 | 2 / 0   |
| Phytone                                        | ALPL    | P05186 | CHEMBL5979    | 0.112042 | 3 / 0   |
| 2 $\alpha$ ,19 $\alpha$ -Dihydroxyursolic acid | AMPD2   | Q01433 | CHEMBL2997    | 0.110612 | 12 / 0  |
| Rosmarinic acid                                | AMPD3   | Q01432 | CHEMBL2912    | 0.10934  | 18 / 0  |
| Apigenin                                       | AMY1A   | P04745 | CHEMBL2478    | 0.329868 | 1 / 1   |
| Rosmarinic acid methyl ester                   | ANPEP   | P15144 | CHEMBL1907    | 0.113286 | 24 / 0  |
| Carvone Hydrate                                | AOC3    | Q16853 | CHEMBL3437    | 0.116739 | 31 / 0  |
| Chrysin                                        | APEX1   | P27695 | CHEMBL5619    | 0.119895 | 0 / 1   |
| Caffeic acid                                   | APP     | P05067 | CHEMBL2487    | 0.071787 | 0 / 44  |
| Carvone Hydrate                                | AR      | P10275 | CHEMBL1871    | 0.158398 | 0 / 50  |
| Apigenin                                       | ARG1    | P05089 | CHEMBL1075097 | 0.370888 | 2 / 2   |
| Decyl acetate                                  | ASAH1   | Q13510 | CHEMBL5463    | 0.031227 | 29 / 0  |
| Carvone Hydrate                                | ATP12A  | P54707 | CHEMBL2933    | 0.133391 | 0 / 9   |
| Rosmarinic acid ethyl ester                    | AURKA   | O14965 | CHEMBL4722    | 0.115737 | 27 / 0  |
| Rosmarinic acid ethyl ester                    | AURKB   | Q96GD4 | CHEMBL2185    | 0.115737 | 141 / 0 |
| Apigenin                                       | AVPR2   | P30518 | CHEMBL1790    | 0.108771 | 3 / 1   |
| Rotungenoside                                  | AXL     | P30530 | CHEMBL4895    | 0.035898 | 17 / 0  |
| Carvone Hydrate                                | BACE1   | P56817 | CHEMBL4822    | 0.141787 | 0 / 1   |
| Decanoic acid                                  | BCAT2   | O15382 | CHEMBL3616354 | 0.125076 | 2 / 0   |
| Carvone Hydrate                                | BCHE    | P06276 | CHEMBL1914    | 0.133391 | 0 / 2   |
| 5Z-Dodecenyl Acetate                           | BCL2    | P10415 | CHEMBL4860    | 0.060425 | 31 / 0  |
| PubChem CID 21637755                           | BCL2L1  | Q07817 | CHEMBL4625    | 0.079146 | 1 / 3   |
| Rosmarinic acid ethyl ester                    | BMP1    | P13497 | CHEMBL3898    | 0.115737 | 236 / 0 |
| Rosmarinic acid ethyl ester                    | BRAF    | P15056 | CHEMBL5145    | 0.115737 | 131 / 0 |
| Carvone Hydrate                                | BRD2    | P25440 | CHEMBL1293289 | 0.125076 | 9 / 0   |
| Carvone Hydrate                                | BRD4    | O60885 | CHEMBL1163125 | 0.125076 | 40 / 0  |
| Geranyl acetate                                | C1R     | P00736 | CHEMBL4611    | 0.031227 | 22 / 0  |
| Galocatechol                                   | C1S     | P09871 | CHEMBL3913    | 0.101614 | 20 / 0  |
| Phytone                                        | C3AR1   | Q16581 | CHEMBL4761    | 0.112042 | 26 / 0  |
| Phytone                                        | C5AR1   | P21730 | CHEMBL2373    | 0.112042 | 27 / 0  |
| (1R,2R,4R)-Trihydroxy-p-menthane               | CA1     | P00915 | CHEMBL261     | 0.071787 | 11 / 3  |
| Caffeic acid                                   | CA12    | O43570 | CHEMBL3242    | 0.729303 | 37 / 0  |
| Caffeic acid                                   | CA13    | Q8N1Q1 | CHEMBL3912    | 0.08057  | 9 / 0   |
| Caffeic acid                                   | CA14    | Q9ULX7 | CHEMBL3510    | 0.729303 | 14 / 0  |
| (1R,2R,4R)-Trihydroxy-p-menthane               | CA2     | P00918 | CHEMBL205     | 0.08057  | 129 / 0 |

|                                  |          |        |               |          |         |
|----------------------------------|----------|--------|---------------|----------|---------|
| Caffeic acid                     | CA3      | P07451 | CHEMBL2885    | 0.212409 | 5 / 0   |
| Carvone Hydrate                  | CA4      | P22748 | CHEMBL3729    | 0.116739 | 11 / 6  |
| Caffeic acid                     | CA5A     | P35218 | CHEMBL4789    | 0.729303 | 7 / 0   |
| Caffeic acid                     | CA5B     | Q9Y2D0 | CHEMBL3969    | 0.729303 | 7 / 0   |
| Caffeic acid                     | CA6      | P23280 | CHEMBL3025    | 0.729303 | 3 / 14  |
| Caffeic acid                     | CA7      | P43166 | CHEMBL2326    | 0.729303 | 30 / 18 |
| Caffeic acid                     | CA9      | Q16790 | CHEMBL3594    | 0.729303 | 42 / 0  |
| Arachic acid                     | CACNA2D1 | P54289 | CHEMBL1919    | 0.111502 | 0 / 4   |
| Chrysin                          | CALM1    | P62158 | CHEMBL6093    | 0.135616 | 0 / 1   |
| Apigenin                         | CAMK2B   | Q13554 | CHEMBL4121    | 0.108771 | 2 / 2   |
| Rosmarinic acid                  | CAMKK2   | Q96RR4 | CHEMBL5284    | 0.10934  | 1 / 0   |
| Methyl caffeate                  | CBFB     | Q13951 | CHEMBL1615386 | 0.031227 | 1 / 0   |
| Miscanthoside                    | CBR1     | P16152 | CHEMBL5586    | 0.106543 | 0 / 1   |
| Apigenin                         | CCNB3    | Q8WWL7 |               |          |         |
|                                  | CDK1     | P06493 | CHEMBL2094127 | 1        | 13 / 0  |
|                                  | CCNB1    | P14635 |               |          |         |
|                                  | CCNB2    | O95067 |               |          |         |
| 5Z-Dodecenyl Acetate             | CCNE1    | P24864 | CHEMBL1907605 | 0.060425 | 53 / 0  |
|                                  | CDK2     | P24941 |               |          |         |
| Rosmarinic acid ethyl ester      | CCNE1    | P24864 | CHEMBL3038471 | 0.115737 | 20 / 0  |
|                                  | CDK3     | Q00526 |               |          |         |
| Phytone                          | CCR1     | P32246 | CHEMBL2413    | 0.112042 | 89 / 0  |
| Phytone                          | CCR2     | P41597 | CHEMBL4015    | 0.112042 | 6 / 0   |
| Geranyl acetate                  | CCR4     | P51679 | CHEMBL2414    | 0.031227 | 21 / 0  |
| Phytone                          | CCR5     | P51681 | CHEMBL274     | 0.112042 | 0 / 1   |
| Terpinyl Acetate                 | CCR8     | P51685 | CHEMBL4596    | 0.031227 | 12 / 0  |
| Cosmosiine                       | CD38     | P28907 | CHEMBL4660    | 0.118883 | 0 / 3   |
| Carvone Hydrate                  | CD81     | P60033 | CHEMBL1075180 | 0.125076 | 0 / 1   |
| Carvone Hydrate                  | CDC25A   | P30304 | CHEMBL3775    | 0.125076 | 4 / 13  |
| (1R,2R,4R)-Trihydroxy-p-menthane | CDC25B   | P30305 | CHEMBL4804    | 0.08057  | 15 / 11 |
| Perillyl acetate                 | CDC25C   | P30307 | CHEMBL2378    | 0.031227 | 0 / 4   |
| Arachic acid                     | CDC45    | O75419 | CHEMBL3040    | 0.111502 | 0 / 1   |
| 5Z-Dodecenyl Acetate             | CDC7     | O00311 | CHEMBL5443    | 0.060425 | 2 / 0   |
| Icariside E4                     | CDK1     | P06493 | CHEMBL308     | 0.103187 | 12 / 0  |
| 5Z-Dodecenyl Acetate             | CDK19    | Q9BWU1 | CHEMBL6002    | 0.060425 | 1 / 0   |
| Rosmarinic acid methyl ester     | CDK2     | P24941 | CHEMBL301     | 0.113286 | 32 / 0  |
|                                  | CDK2     | P24941 |               |          |         |
| Rosmarinic acid ethyl ester      | CCNA1    | P78396 | CHEMBL2094128 | 0.115737 | 8 / 0   |
|                                  | CCNA2    | P20248 |               |          |         |
| Rosmarinic acid methyl ester     | CDK4     | P11802 | CHEMBL331     | 0.113286 | 53 / 0  |
| Geranyl acetate                  | CDK5     | Q00535 | CHEMBL4036    | 0.031227 | 20 / 0  |
|                                  | CDK5R1   | Q15078 | CHEMBL1907600 | 0.125076 | 24 / 0  |
| Carvone Hydrate                  | CDK5     | Q00535 |               |          |         |
|                                  | CDK6     | Q00534 | CHEMBL2508    | 1        | 4 / 4   |
| Apigenin                         | CDK6     | Q00534 | CHEMBL2508    | 1        | 4 / 4   |

|                                        |         |        |               |          |         |
|----------------------------------------|---------|--------|---------------|----------|---------|
| 5Z-Dodecenyl Acetate                   | CDK8    | P49336 | CHEMBL5719    | 0.060425 | 27 / 0  |
| Terpinyl Acetate                       | CEL     | P19835 | CHEMBL3219    | 0.031227 | 4 / 0   |
| Rosmarinic acid ethyl ester            | CELA1   | Q9UNI1 | CHEMBL3000    | 0.115737 | 2 / 0   |
| Carvone Hydrate                        | CES1    | P23141 | CHEMBL2265    | 0.125076 | 0 / 32  |
| Carvone Hydrate                        | CES2    | O00748 | CHEMBL3180    | 0.133391 | 19 / 12 |
| Apigenin                               | CFTR    | P13569 | CHEMBL4051    | 1        | 2 / 1   |
| Rosmarinic acid ethyl ester            | CHEK1   | O14757 | CHEMBL4630    | 0.115737 | 221 / 0 |
| Phytone                                | CHRM1   | P11229 | CHEMBL216     | 0.112042 | 28 / 0  |
| Vinyl Amyl Carbinol                    | CHRM2   | P08172 | CHEMBL211     | 0.023833 | 0 / 1   |
| Phytone                                | CHRM3   | P20309 | CHEMBL245     | 0.112042 | 29 / 0  |
| Vinyl Amyl Carbinol                    | CHRM4   | P08173 | CHEMBL1821    | 0.023833 | 12 / 0  |
| 3,7-Dimethylocta-2,6-dienyl propanoate | CHRM5   | P08912 | CHEMBL2035    | 0.042894 | 14 / 0  |
| Terpinyl Acetate                       | CHRNA4  | P43681 | CHEMBL1882    | 0.031227 | 1 / 0   |
| 1-Carvone                              | CHRNA4  | P43681 | CHEMBL1907589 | 0.043919 | 7 / 0   |
|                                        | CHRNA7  | P36544 | CHEMBL2492    | 0.111502 | 0 / 2   |
| Arachic acid                           | CHRNA7  | P36544 | CHEMBL2492    | 0.111502 | 0 / 2   |
| Geranyl acetate                        | CHUK    | O15111 | CHEMBL3476    | 0.031227 | 8 / 0   |
| Methyl caffeate                        | CISD1   | Q9NZ45 | CHEMBL1795168 | 0.031227 | 2 / 0   |
| 5Z-Dodecenyl Acetate                   | CIT     | O14578 | CHEMBL5579    | 0.060425 | 2 / 0   |
| (+/-)-Eriodictyol                      | CLK1    | P49759 | CHEMBL4224    | 0.097875 | 10 / 0  |
| 5Z-Dodecenyl Acetate                   | CLK4    | Q9HAZ1 | CHEMBL4203    | 0.060425 | 70 / 0  |
| Phytone                                | CNR1    | P21554 | CHEMBL218     | 0.112042 | 723 / 0 |
| Phytone                                | CNR2    | P34972 | CHEMBL253     | 0.112042 | 1 / 1   |
| 3,4-Dihydroxy-5-methoxybenzaldehyde    | COMT    | P21964 | CHEMBL2023    | 0.116739 | 0 / 5   |
| Terpinyl Acetate                       | CREBBP  | Q92793 | CHEMBL5747    | 0.031227 | 1 / 0   |
| 5Z-Dodecenyl Acetate                   | CSF1R   | P07333 | CHEMBL1844    | 0.060425 | 135 / 0 |
| 5Z-Dodecenyl Acetate                   | CSNK1A1 | P48729 | CHEMBL2793    | 0.060425 | 1 / 0   |
| 5Z-Dodecenyl Acetate                   | CSNK1D  | P48730 | CHEMBL2828    | 0.060425 | 2 / 0   |
| 3,7-Dimethylocta-2,6-dienyl propanoate | CSNK1E  | P49674 | CHEMBL4937    | 0.042894 | 1 / 0   |
| Apigenin                               | CSNK2A1 | P68400 | CHEMBL3629    | 1        | 2 / 2   |
| Caffeic acid                           | CTBP2   | P56545 | CHEMBL3797016 | 0.071787 | 10 / 0  |
| Terpinyl Acetate                       | CTRB1   | P17538 | CHEMBL4796    | 0.031227 | 4 / 0   |
| Terpinyl Acetate                       | CTRC    | Q99895 | CHEMBL2386    | 0.04147  | 4 / 3   |
| (+/-)-Eriodictyol                      | CTSB    | P07858 | CHEMBL4072    | 0.097875 | 40 / 0  |
| D-Myrtenal                             | CTSD    | P07339 | CHEMBL2581    | 0.043919 | 0 / 1   |
| Geranyl acetate                        | CTSH    | P09668 | CHEMBL2225    | 0.031227 | 7 / 0   |
| 5Z-Dodecenyl Acetate                   | CTSK    | P43235 | CHEMBL268     | 0.060425 | 95 / 0  |
| Phytone                                | CTSL    | P07711 | CHEMBL3837    | 0.112042 | 62 / 0  |
| 3,7-Dimethylocta-2,6-dienyl propanoate | CTSS    | P25774 | CHEMBL2954    | 0.042894 | 155 / 0 |
| 2-Dodecenal                            | CTSV    | O60911 | CHEMBL3272    | 0.071787 | 8 / 0   |
| Decanoic acid                          | CXCL8   | P10145 | CHEMBL2157    | 0.141787 | 12 / 0  |
| Apigenin                               | CXCR1   | P25024 | CHEMBL4029    | 0.108771 | 2 / 1   |
| Cyclohexane                            | CXCR3   | P49682 | CHEMBL4441    | 0.042894 | 2 / 0   |
| Carvone Hydrate                        | CYP11B1 | P15538 | CHEMBL1908    | 0.125076 | 178 / 0 |



|                                                |         |        |               |          |         |
|------------------------------------------------|---------|--------|---------------|----------|---------|
| Carvone Hydrate                                | CYP11B2 | P19099 | CHEMBL2722    | 0.125076 | 221 / 0 |
| Carvone Hydrate                                | CYP17A1 | P05093 | CHEMBL3522    | 0.133391 | 81 / 9  |
| Carvone Hydrate                                | CYP19A1 | P11511 | CHEMBL1978    | 0.150098 | 0 / 163 |
| Chrysin                                        | CYP1A1  | P04798 | CHEMBL2231    | 0.12775  | 0 / 7   |
| Caffeic acid                                   | CYP1A2  | P05177 | CHEMBL3356    | 0.071787 | 2 / 5   |
| Miscanthoside                                  | CYP1B1  | Q16678 | CHEMBL4878    | 0.106543 | 0 / 6   |
| Palmitic Acid                                  | CYP26A1 | O43174 | CHEMBL5141    | 0.053556 | 7 / 0   |
| Palmitic Acid                                  | CYP26B1 | Q9NR63 | CHEMBL3713687 | 0.053556 | 9 / 0   |
| 2- Dodecenal                                   | CYP27A1 | Q02318 | CHEMBL5992    | 0.071787 | 3 / 0   |
| Geranyl acetate                                | CYP2A6  | P11509 | CHEMBL5282    | 0.031227 | 21 / 0  |
| Caffeic acid                                   | CYP2C19 | P33261 | CHEMBL3622    | 0.071787 | 0 / 1   |
| Caffeic acid                                   | CYP2C9  | P11712 | CHEMBL3397    | 0.071787 | 0 / 3   |
| Caffeic acid                                   | CYP3A4  | P08684 | CHEMBL340     | 0.071787 | 0 / 3   |
| Carvone Hydrate                                | CYP51A1 | Q16850 | CHEMBL3849    | 0.125076 | 2 / 0   |
| Coleonolic acid                                | CYSLTR1 | Q9Y271 | CHEMBL1798    | 0.120226 | 19 / 0  |
| Methyl caffeate                                | DAO     | P14920 | CHEMBL5485    | 0.031227 | 34 / 0  |
| Apigenin                                       | DAPK1   | P53355 | CHEMBL2558    | 0.116965 | 2 / 2   |
| 3,7-Dimethylocta-2,6-dienyl propanoate         | DAPK3   | O43293 | CHEMBL2468    | 0.042894 | 12 / 0  |
| Decyl acetate                                  | DCK     | P27707 | CHEMBL2447    | 0.031227 | 9 / 0   |
| 3,7-Dimethylocta-2,6-dienyl propanoate         | DCTPP1  | Q9H773 | CHEMBL3769292 | 0.042894 | 7 / 0   |
| 5Z-Dodecenyl Acetate                           | DDR1    | Q08345 | CHEMBL5319    | 0.060425 | 6 / 0   |
| 5Z-Dodecenyl Acetate                           | DGAT1   | O75907 | CHEMBL6009    | 0.060425 | 20 / 0  |
| $\beta$ -sitosterol                            | DHCR7   | Q9UBM7 | CHEMBL2169735 | 0.106166 | 3 / 5   |
| Rosmarinic acid                                | DHODH   | Q02127 | CHEMBL1966    | 0.10934  | 16 / 0  |
| Rosmarinic acid ethyl ester                    | DNM1    | Q05193 | CHEMBL4958    | 0.115737 | 13 / 0  |
| Coleonolic acid                                | DNTT    | P04053 | CHEMBL4810    | 0.120226 | 0 / 3   |
| Rosmarinic acid methyl ester                   | DRD1    | P21728 | CHEMBL2056    | 0.113286 | 3 / 0   |
| Carvone Hydrate                                | DRD2    | P14416 | CHEMBL217     | 0.125076 | 11 / 0  |
| Amentoflavone                                  | DRD3    | P35462 | CHEMBL234     | 1        | 3 / 0   |
| Carvone Hydrate                                | DRD4    | P21917 | CHEMBL219     | 0.125076 | 4 / 0   |
| 3,4-Dihydroxy-5-methoxybenzaldehyde            | DUSP1   | P28562 | CHEMBL6026    | 0.116739 | 1 / 0   |
| Coleonolic acid                                | DUSP3   | P51452 | CHEMBL2635    | 0.120226 | 4 / 0   |
| Rosmarinic acid ethyl ester                    | DUT     | P33316 | CHEMBL5203    | 0.115737 | 7 / 0   |
| (+/-)-Eriodictyol                              | DYRK1A  | Q13627 | CHEMBL2292    | 0.097875 | 54 / 0  |
| (+/-)-Eriodictyol                              | DYRK1B  | Q9Y463 | CHEMBL5543    | 0.097875 | 26 / 0  |
| 2 $\alpha$ ,19 $\alpha$ -Dihydroxyursolic acid | EDNRA   | P25101 | CHEMBL252     | 0.110612 | 102 / 0 |
| 2 $\alpha$ ,19 $\alpha$ -Dihydroxyursolic acid | EDNRB   | P24530 | CHEMBL1785    | 0.110612 | 53 / 0  |
| Caffeic acid                                   | EGFR    | P00533 | CHEMBL203     | 0.071787 | 229 / 0 |
| Rosmarinic acid methyl ester                   | EIF2AK2 | P19525 | CHEMBL5785    | 0.113286 | 6 / 0   |
| Miscanthoside                                  | EIF4A1  | P60842 | CHEMBL2052028 | 0.106543 | 0 / 29  |
| Rosmarinic acid                                | EIF4H   | Q15056 | CHEMBL1293274 | 0.10934  | 1 / 0   |
| Caffeic acid                                   | ELANE   | P08246 | CHEMBL248     | 0.071787 | 5 / 2   |
| Rosmarinic acid ethyl ester                    | EP300   | Q09472 | CHEMBL3784    | 0.115737 | 9 / 0   |
| Terpinyl Acetate                               | EPAS1   | Q99814 | CHEMBL1744522 | 0.031227 | 20 / 1  |

|                                                |        |        |               |          |         |
|------------------------------------------------|--------|--------|---------------|----------|---------|
| Rosmarinic acid methyl ester                   | EPHB4  | P54760 | CHEMBL5147    | 0.113286 | 39 / 0  |
| Phytone                                        | EPHX1  | P07099 | CHEMBL1968    | 0.112042 | 42 / 0  |
| Phytone                                        | EPHX2  | P34913 | CHEMBL2409    | 0.112042 | 6 / 0   |
| Caffeic acid                                   | ERBB2  | P04626 | CHEMBL1824    | 0.071787 | 9 / 3   |
| 3,4-Dihydroxy-5-methoxybenzaldehyde            | ERN1   | O75460 | CHEMBL1163101 | 0.150098 | 65 / 0  |
| (1R,2R,4R)-Trihydroxy-p-menthane               | ESR1   | P03372 | CHEMBL206     | 0.08057  | 0 / 30  |
| Carvone Hydrate                                | ESR2   | Q92731 | CHEMBL242     | 0.116739 | 0 / 10  |
| Rosmarinic acid methyl ester                   | ESRRA  | P11474 | CHEMBL3429    | 0.113286 | 18 / 0  |
| Rosmarinic acid methyl ester                   | ESRRB  | O95718 | CHEMBL3751    | 0.113286 | 18 / 0  |
| Thymol                                         | ESRRG  | P62508 | CHEMBL4245    | 0.043919 | 0 / 1   |
| Cosmosiine                                     | F10    | P00742 | CHEMBL244     | 0.118883 | 17 / 0  |
| PubChem CID 21637755                           | F2     | P00734 | CHEMBL204     | 0.087714 | 10 / 7  |
| 5Z-Dodecenyl Acetate                           | F2R    | P25116 | CHEMBL3974    | 0.060425 | 103 / 0 |
| Caffeic acid                                   | F3     | P13726 | CHEMBL4081    | 0.071787 | 0 / 9   |
| 2 $\alpha$ ,19 $\alpha$ -Dihydroxyursolic acid | FAAH   | O00519 | CHEMBL2243    | 0.110612 | 9 / 9   |
| Carvone Hydrate                                | FABP1  | P07148 | CHEMBL5421    | 0.125076 | 0 / 2   |
| Arachic acid                                   | FABP2  | P12104 | CHEMBL4879    | 0.340526 | 2 / 1   |
| Carvone Hydrate                                | FABP3  | P05413 | CHEMBL3344    | 0.125076 | 0 / 4   |
| Carvone Hydrate                                | FABP4  | P15090 | CHEMBL2083    | 0.125076 | 0 / 3   |
| Carvone Hydrate                                | FABP5  | Q01469 | CHEMBL3674    | 0.125076 | 0 / 1   |
| 2 $\alpha$ ,19 $\alpha$ -Dihydroxyursolic acid | FDFT1  | P37268 | CHEMBL3338    | 0.110612 | 0 / 1   |
| Arachic acid                                   | FFAR1  | O14842 | CHEMBL4422    | 0.26156  | 58 / 3  |
| Palmitic Acid                                  | FFAR4  | Q5NUL3 | CHEMBL5339    | 0.053556 | 15 / 0  |
| (+/-)-Eriodictyol                              | FGFR1  | P11362 | CHEMBL3650    | 0.097875 | 5 / 0   |
| Carvone Hydrate                                | FKBP1A | P62942 | CHEMBL1902    | 0.116739 | 2 / 0   |
| 5Z-Dodecenyl Acetate                           | FLT1   | P17948 | CHEMBL1868    | 0.060425 | 124 / 0 |
| Rosmarinic acid methyl ester                   | FLT3   | P36888 | CHEMBL1974    | 0.113286 | 11 / 0  |
| 5Z-Dodecenyl Acetate                           | FLT4   | P35916 | CHEMBL1955    | 0.060425 | 34 / 0  |
| 2 $\alpha$ ,19 $\alpha$ -Dihydroxyursolic acid | FNTA   | P49354 | CHEMBL2094108 | 0.110612 | 37 / 9  |
|                                                | FNTB   | P49356 |               |          |         |
| 5Z-Dodecenyl Acetate                           | FRK    | P42685 | CHEMBL4223    | 0.060425 | 4 / 0   |
| (+/-)-Eriodictyol                              | FUT4   | P22083 | CHEMBL4996    | 0.097875 | 0 / 1   |
| 3,4-Dihydroxy-5-methoxybenzaldehyde            | FUT7   | Q11130 | CHEMBL3596077 | 0.116739 | 0 / 2   |
| Caffeic acid                                   | FYN    | P06241 | CHEMBL1841    | 0.071787 | 0 / 2   |
| Carvone Hydrate                                | G6PD   | P11413 | CHEMBL5347    | 0.125076 | 0 / 2   |
| Arachic acid                                   | GABBR1 | Q9UBS5 | CHEMBL2064    | 0.127303 | 0 / 4   |
| Geranyl acetate                                | GABRA1 | P14867 | CHEMBL1962    | 0.031227 | 24 / 0  |
|                                                | GABRA1 | P14867 |               |          |         |
|                                                | GABRA1 | P14867 |               |          |         |
| Amentoflavone                                  | GABRB2 | P47870 | CHEMBL2095172 | 1        | 5 / 3   |
|                                                | GABRG2 | P18507 |               |          |         |
|                                                | GABRA2 | P47869 |               |          |         |
| Arachic acid                                   | GABRB2 | P47870 | CHEMBL2111413 | 0.119404 | 3 / 0   |
|                                                | GABRG2 | P18507 |               |          |         |
| Geranyl acetate                                | GABRA2 | P47869 | CHEMBL2094130 | 0.031227 | 21 / 0  |

|                                        |        |        |               |          |         |
|----------------------------------------|--------|--------|---------------|----------|---------|
|                                        | GABRB3 | P28472 |               |          |         |
|                                        | GABRG2 | P18507 |               |          |         |
| Geranyl acetate                        | GABRA5 | P31644 | CHEMBL5112    | 0.031227 | 21 / 0  |
|                                        | GABRB3 | P28472 |               |          |         |
| Geranyl acetate                        | GABRA3 | P34903 | CHEMBL2094120 | 0.031227 | 27 / 0  |
|                                        | GABRG2 | P18507 |               |          |         |
|                                        | GABRB3 | P28472 |               |          |         |
| Geranyl acetate                        | GABRG2 | P18507 | CHEMBL2094121 | 0.031227 | 22 / 0  |
|                                        | GABRA1 | P14867 |               |          |         |
|                                        | GABRB3 | P28472 |               |          |         |
| Geranyl acetate                        | GABRG2 | P18507 | CHEMBL2094122 | 0.031227 | 55 / 0  |
|                                        | GABRA5 | P31644 |               |          |         |
|                                        | GABRG2 | P18507 |               |          |         |
| 2- Dodecenal                           | GABRB3 | P28472 | CHEMBL2095190 | 0.071787 | 6 / 0   |
|                                        | GABRA6 | Q16445 |               |          |         |
| 3,7-Dimethylocta-2,6-dienyl propanoate | GAK    | O14976 | CHEMBL4355    | 0.042894 | 3 / 0   |
| 5Z-Dodecenyl Acetate                   | GCGR   | P47871 | CHEMBL1985    | 0.060425 | 3 / 0   |
| 5Z-Dodecenyl Acetate                   | GCK    | P35557 | CHEMBL3820    | 0.060425 | 15 / 0  |
| PubChem CID 21637755                   | GLI1   | P08151 | CHEMBL5461    | 0.079146 | 0 / 2   |
| Galocatechol                           | GLI2   | P10070 | CHEMBL5119    | 0.101614 | 0 / 1   |
| Apigenin                               | GLO1   | Q04760 | CHEMBL2424    | 0.370888 | 3 / 4   |
| $\beta$ -sitosterol                    | GLRA1  | P23415 | CHEMBL5845    | 0.106166 | 1 / 1   |
| Carvone Hydrate                        | GLUL   | P15104 | CHEMBL4612    | 0.116739 | 0 / 1   |
| Carvone Hydrate                        | GPBAR1 | Q8TDU6 | CHEMBL5409    | 0.116739 | 0 / 16  |
| Gallic acid                            | GPR35  | Q9HC97 | CHEMBL1293267 | 0.116739 | 1 / 0   |
| Terpinyl Acetate                       | GPR55  | Q9Y2T6 | CHEMBL1075322 | 0.031227 | 2 / 0   |
| Phytone                                | GPR88  | Q9GZN0 | CHEMBL3399910 | 0.112042 | 2 / 0   |
| Decyl acetate                          | GRIA2  | P42262 | CHEMBL4016    | 0.031227 | 9 / 0   |
| Decyl acetate                          | GRIA4  | P48058 | CHEMBL3190    | 0.031227 | 2 / 0   |
| Oleanolic acid                         | GRIK1  | P39086 | CHEMBL1918    | 0.100634 | 0 / 26  |
| Maslinic acid                          | GRIK2  | Q13002 | CHEMBL3683    | 0.120226 | 0 / 6   |
| 5Z-Dodecenyl Acetate                   | GRIN2B | Q13224 | CHEMBL1904    | 0.060425 | 18 / 0  |
| Rosmarinic acid ethyl ester            | GRK2   | P25098 | CHEMBL4079    | 0.115737 | 12 / 0  |
| Apigenin                               | GRK6   | P43250 | CHEMBL6144    | 0.329868 | 3 / 0   |
| Phytone                                | GRM1   | Q13255 | CHEMBL3772    | 0.112042 | 60 / 0  |
| 5Z-Dodecenyl Acetate                   | GRM2   | Q14416 | CHEMBL5137    | 0.060425 | 11 / 0  |
| Geranyl acetate                        | GRM4   | Q14833 | CHEMBL2736    | 0.031227 | 32 / 0  |
| Arachic acid                           | GRM5   | P41594 | CHEMBL3227    | 0.111502 | 225 / 0 |
| Apigenin                               | GSK3B  | P49841 | CHEMBL262     | 1        | 19 / 1  |
| Carvone Hydrate                        | GSR    | P00390 | CHEMBL2755    | 0.125076 | 2 / 0   |
| Arachic acid                           | GSTK1  | Q9Y2Q3 | CHEMBL4491    | 0.111502 | 0 / 1   |
| Rosmarinic acid methyl ester           | GUSB   | P08236 | CHEMBL2728    | 0.113286 | 15 / 0  |
| Carvone Hydrate                        | HAO1   | Q9UJM8 | CHEMBL4229    | 0.116739 | 7 / 1   |
| Caffeic acid                           | HCAR2  | Q8TDS4 | CHEMBL3785    | 0.08057  | 0 / 1   |

|                                                |          |        |               |          |          |
|------------------------------------------------|----------|--------|---------------|----------|----------|
| Rosmarinic acid ethyl ester                    | HDAC1    | Q13547 | CHEMBL325     | 0.115737 | 537 / 0  |
| Rosmarinic acid methyl ester                   | HDAC2    | Q92769 | CHEMBL1937    | 0.113286 | 186 / 0  |
| Rosmarinic acid ethyl ester                    | HDAC3    | O15379 | CHEMBL1829    | 0.115737 | 198 / 0  |
| Rosmarinic acid ethyl ester                    | HDAC6    | Q9UBN7 | CHEMBL1865    | 0.115737 | 354 / 0  |
| Rosmarinic acid methyl ester                   | HDAC8    | Q9BY41 | CHEMBL3192    | 0.113286 | 216 / 0  |
| (+/-)-Eriodictyol                              | HIF1A    | Q16665 | CHEMBL4261    | 0.097875 | 0 / 2    |
| 2 $\alpha$ ,19 $\alpha$ -Dihydroxyursolic acid | HMGCR    | P04035 | CHEMBL402     | 0.110612 | 0 / 37   |
| Carvone Hydrate                                | HMOX1    | P09601 | CHEMBL2823    | 0.116739 | 7 / 0    |
| Decyl acetate                                  | HPGD     | P15428 | CHEMBL1293255 | 0.031227 | 16 / 0   |
| Geranyl acetate                                | HPRT1    | P00492 | CHEMBL2360    | 0.031227 | 1 / 0    |
| CAS 1038743-23-5                               | HRAS     | P01112 | CHEMBL2167    | 0.055648 | 1 / 0    |
| 5Z-Dodecenyl Acetate                           | HRH1     | P35367 | CHEMBL231     | 0.060425 | 30 / 0   |
| 5Z-Dodecenyl Acetate                           | HRH3     | Q9Y5N1 | CHEMBL264     | 0.060425 | 70 / 0   |
| 5Z-Dodecenyl Acetate                           | HRH4     | Q9H3N8 | CHEMBL3759    | 0.060425 | 36 / 0   |
| Carvone Hydrate                                | HSD11B1  | P28845 | CHEMBL4235    | 0.125076 | 229 / 16 |
| Carvone Hydrate                                | HSD11B2  | P80365 | CHEMBL3746    | 0.125076 | 0 / 18   |
| Miscanthoside                                  | HSD17B1  | P14061 | CHEMBL3181    | 0.106543 | 0 / 1    |
| Carvone Hydrate                                | HSD17B2  | P37059 | CHEMBL2789    | 0.125076 | 37 / 0   |
| Arachic acid                                   | HSD17B3  | P37058 | CHEMBL4234    | 0.127303 | 19 / 0   |
| Phytone                                        | HSD3B1   | P14060 | CHEMBL1958    | 0.112042 | 10 / 0   |
| Phytone                                        | HSP90AA1 | P07900 | CHEMBL3880    | 0.112042 | 14 / 0   |
| Rosmarinic acid methyl ester                   | HSP90AB1 | P08238 | CHEMBL4303    | 0.113286 | 69 / 0   |
| 5Z-Dodecenyl Acetate                           | HTR2A    | P28223 | CHEMBL224     | 0.060425 | 20 / 0   |
| Palmitic Acid                                  | HTR2B    | P41595 | CHEMBL1833    | 0.053556 | 8 / 0    |
| Amentoflavone                                  | HTR2C    | P28335 | CHEMBL225     | 1        | 30 / 0   |
| 1-Carvone                                      | HTR7     | P34969 | CHEMBL3155    | 0.043919 | 1 / 0    |
| Geranyl acetate                                | HTT      | P42858 | CHEMBL5514    | 0.031227 | 4 / 0    |
| Terpinyl Acetate                               | ICAM1    | P05362 | CHEMBL3070    | 0.031227 | 3 / 0    |
| Phytone                                        | ICMT     | O60725 | CHEMBL4699    | 0.112042 | 45 / 0   |
| Geranyl acetate                                | IDH1     | O75874 | CHEMBL2007625 | 0.031227 | 134 / 0  |
| Carvone Hydrate                                | IDO1     | P14902 | CHEMBL4685    | 0.116739 | 16 / 0   |
| Gallic acid                                    | IGF1R    | P08069 | CHEMBL1957    | 0.125076 | 0 / 3    |
| Rosmarinic acid                                | IGFBP3   | P17936 | CHEMBL3997    | 0.10934  | 28 / 0   |
| Rosmarinic acid                                | IGFBP5   | P24593 | CHEMBL2665    | 0.10934  | 7 / 0    |
| Chrysin                                        | IKKB     | O14920 | CHEMBL1991    | 0.198444 | 29 / 0   |
| Perillyl acetate                               | IL1B     | P01584 | CHEMBL1909490 | 0.031227 | 0 / 2    |
| Cosmosiine                                     | IL2      | P60568 | CHEMBL5880    | 0.295838 | 0 / 4    |
| Carvone Hydrate                                | IL6      | P05231 | CHEMBL1795129 | 0.116739 | 0 / 1    |
| Rosmarinic acid ethyl ester                    | IMPDH1   | P20839 | CHEMBL1822    | 0.115737 | 14 / 0   |
| 5Z-Dodecenyl Acetate                           | IMPDH2   | P12268 | CHEMBL2002    | 0.060425 | 12 / 0   |
| Rosmarinic acid methyl ester                   | INSR     | P06213 | CHEMBL1981    | 0.113286 | 10 / 0   |
| Carvone Hydrate                                | ITGAL    | P20701 | CHEMBL1803    | 0.116739 | 0 / 4    |
| Palmitic Acid                                  | ITGAL    | P20701 | CHEMBL2096661 | 0.053556 | 6 / 0    |
|                                                | ICAM1    | P05362 |               |          |          |

|                                                |             |        |               |          |         |
|------------------------------------------------|-------------|--------|---------------|----------|---------|
|                                                | ITGB2       | P05107 |               |          |         |
|                                                |             | P05556 |               |          |         |
| 2 $\alpha$ ,19 $\alpha$ -Dihydroxyursolic acid | ITGB1 ITGA4 | P13612 | CHEMBL1907599 | 0.110612 | 246 / 0 |
| 5Z-Dodecenyl Acetate                           | JAK1        | P23458 | CHEMBL2835    | 0.060425 | 65 / 0  |
| 5Z-Dodecenyl Acetate                           | JAK2        | O60674 | CHEMBL2971    | 0.060425 | 99 / 0  |
| Vinyl Amyl Carbinol                            | JAK3        | P52333 | CHEMBL2148    | 0.023833 | 43 / 0  |
| PubChem CID 21637755                           | JUN         | P05412 | CHEMBL4977    | 0.079146 | 2 / 5   |
| Methyl geranate                                | KAT2B       | Q92831 | CHEMBL5500    | 0.071787 | 5 / 0   |
| Vinyl Amyl Carbinol                            | KCNA5       | P22460 | CHEMBL4306    | 0.023833 | 9 / 0   |
| Rosmarinic acid methyl ester                   | KCNH2       | Q12809 | CHEMBL240     | 0.113286 | 9 / 0   |
|                                                | KCNJ11      | Q14654 |               |          |         |
| 5Z-Dodecenyl Acetate                           | ABCC9       | O60706 | CHEMBL2095198 | 0.060425 | 9 / 0   |
|                                                | KCNJ5       | P48544 |               |          |         |
| 3-Cyclohexene-1-methanol                       | KCNJ3       | P48549 | CHEMBL3038488 | 0.031227 | 3 / 0   |
| Terpinyl Acetate                               | KCNK2       | O95069 | CHEMBL2321615 | 0.031227 | 1 / 0   |
| Perillyl acetate                               | KCNMA1      | Q12791 | CHEMBL4304    | 0.031227 | 5 / 0   |
| Arachic acid                                   | KDM2A       | Q9Y2K7 | CHEMBL1938210 | 0.127303 | 3 / 1   |
| Caffeic acid                                   | KDM4A       | O75164 | CHEMBL5896    | 0.071787 | 4 / 0   |
| Caffeic acid                                   | KDM4E       | B2RXH2 | CHEMBL1293226 | 0.071787 | 4 / 0   |
| Arachic acid                                   | KDM5C       | P41229 | CHEMBL2163176 | 0.127303 | 4 / 1   |
| Phytone                                        | KDR         | P35968 | CHEMBL279     | 0.112042 | 66 / 0  |
| 3-Cyclohexene-1-methanol                       | KIF11       | P52732 | CHEMBL4581    | 0.031227 | 3 / 0   |
| 3,7-Dimethylocta-2,6-dienyl propanoate         | KIF20A      | O95235 | CHEMBL2021753 | 0.042894 | 4 / 0   |
| 5Z-Dodecenyl Acetate                           | KIT         | P10721 | CHEMBL1936    | 0.060425 | 130 / 0 |
| Luteolin 7-(6"-ferulylglucoside)               | KLK1        | P06870 | CHEMBL2319    | 0.055648 | 1 / 0   |
| Luteolin 7-(6"-ferulylglucoside)               | KLK2        | P20151 | CHEMBL2442    | 0.055648 | 1 / 0   |
| Methyl geranate                                | LAP3        | P28838 | CHEMBL3965    | 0.071787 | 0 / 1   |
| Caffeic acid                                   | LCK         | P06239 | CHEMBL258     | 0.071787 | 8 / 6   |
| Gallic acid                                    | LDHA        | P00338 | CHEMBL4835    | 0.125076 | 0 / 14  |
| Gallic acid                                    | LDHB        | P07195 | CHEMBL4940    | 0.125076 | 0 / 11  |
| Phytone                                        | LDLR        | P01130 | CHEMBL3311    | 0.112042 | 10 / 0  |
| 5Z-Dodecenyl Acetate                           | LIMK2       | P53671 | CHEMBL5932    | 0.060425 | 66 / 0  |
| Geranyl acetate                                | LIPE        | Q05469 | CHEMBL3590    | 0.031227 | 20 / 0  |
| Carvone Hydrate                                | LRRK2       | Q5S007 | CHEMBL1075104 | 0.125076 | 9 / 0   |
| Caryophyllene oxide                            | LSS         | P48449 | CHEMBL3593    | 0.060425 | 0 / 8   |
| Arachic acid                                   | LTA4H       | P09960 | CHEMBL4618    | 0.111502 | 0 / 1   |
| 2 $\alpha$ ,19 $\alpha$ -Dihydroxyursolic acid | LTB4R       | Q15722 | CHEMBL3911    | 0.110612 | 0 / 4   |
| Daucosterol                                    | MAOA        | P21397 | CHEMBL1951    | 0.074392 | 125 / 1 |
| Caffeic acid                                   | MAOB        | P27338 | CHEMBL2039    | 0.071787 | 239 / 0 |
| Rotungenoside                                  | MAP2K1      | Q02750 | CHEMBL3587    | 0.035898 | 47 / 0  |
| Rosmarinic acid ethyl ester                    | MAP2K2      | P36507 | CHEMBL2964    | 0.115737 | 5 / 0   |
| 5Z-Dodecenyl Acetate                           | MAP3K19     | Q56UN5 | CHEMBL6191    | 0.060425 | 5 / 0   |
| 5Z-Dodecenyl Acetate                           | MAP3K20     | Q9NYL2 | CHEMBL3886    | 0.060425 | 2 / 0   |
| Caffeic acid                                   | MAPK1       | P28482 | CHEMBL4040    | 0.071787 | 7 / 1   |

|                                                |        |        |               |          |         |
|------------------------------------------------|--------|--------|---------------|----------|---------|
| 5Z-Dodecenyl Acetate                           | MAPK10 | P53779 | CHEMBL2637    | 0.060425 | 187 / 0 |
| Phytone                                        | MAPK14 | Q16539 | CHEMBL260     | 0.112042 | 24 / 0  |
| Carvone Hydrate                                | MAPK3  | P27361 | CHEMBL3385    | 0.133391 | 0 / 1   |
| Rotungenoside                                  | MAPK8  | P45983 | CHEMBL2276    | 0.035898 | 35 / 0  |
| Rotungenoside                                  | MAPK9  | P45984 | CHEMBL4179    | 0.035898 | 15 / 0  |
| Gallocatechol                                  | MAPT   | P10636 | CHEMBL1293224 | 0.101614 | 4 / 1   |
| Methyl caffeate                                | MB     | P02144 | CHEMBL2406892 | 0.031227 | 4 / 0   |
| 5Z-Dodecenyl Acetate                           | MCL1   | Q07820 | CHEMBL4361    | 0.060425 | 4 / 0   |
| Phytone                                        | MDM2   | Q00987 | CHEMBL5023    | 0.112042 | 260 / 0 |
| 3,7-Dimethylocta-2,6-dienyl propanoate         | MEN1   | O00255 | CHEMBL1615381 | 0.042894 | 2 / 0   |
| Rotungenoside                                  | MERTK  | Q12866 | CHEMBL5331    | 0.035898 | 22 / 0  |
| Daucosterol                                    | MET    | P08581 | CHEMBL3717    | 0.074392 | 44 / 22 |
| Neryl Acetate                                  | METAP1 | P53582 | CHEMBL2474    | 0.031227 | 2 / 0   |
| Rosmarinic acid                                | METAP2 | P50579 | CHEMBL3922    | 0.10934  | 11 / 0  |
| Phytone                                        | MGLL   | Q99685 | CHEMBL4191    | 0.112042 | 41 / 0  |
| Carvone Hydrate                                | MIF    | P14174 | CHEMBL2085    | 0.116739 | 18 / 1  |
| 2 $\alpha$ ,19 $\alpha$ -Dihydroxyursolic acid | MME    | P08473 | CHEMBL1944    | 0.110612 | 118 / 0 |
| Caffeic acid                                   | MMP1   | P03956 | CHEMBL332     | 0.729303 | 43 / 27 |
| Miscanthoside                                  | MMP12  | P39900 | CHEMBL4393    | 0.106543 | 3 / 3   |
| Miscanthoside                                  | MMP13  | P45452 | CHEMBL280     | 0.106543 | 1 / 1   |
| Rosmarinic acid                                | MMP14  | P50281 | CHEMBL3869    | 0.10934  | 118 / 0 |
| Rosmarinic acid methyl ester                   | MMP15  | P51511 | CHEMBL2963    | 0.113286 | 12 / 0  |
| Rosmarinic acid methyl ester                   | MMP16  | P51512 | CHEMBL2200    | 0.113286 | 24 / 0  |
| Caffeic acid                                   | MMP2   | P08253 | CHEMBL333     | 0.729303 | 38 / 27 |
| Rosmarinic acid methyl ester                   | MMP26  | Q9NRE1 | CHEMBL4707    | 0.113286 | 10 / 0  |
| 2 $\alpha$ ,19 $\alpha$ -Dihydroxyursolic acid | MMP3   | P08254 | CHEMBL283     | 0.110612 | 40 / 0  |
| Rosmarinic acid ethyl ester                    | MMP7   | P09237 | CHEMBL4073    | 0.115737 | 107 / 0 |
| CAS 1038743-23-5                               | MMP8   | P22894 | CHEMBL4588    | 0.055648 | 10 / 0  |
| Caffeic acid                                   | MMP9   | P14780 | CHEMBL321     | 0.729303 | 42 / 25 |
| Apigenin                                       | MPG    | P29372 | CHEMBL3396943 | 0.116965 | 1 / 1   |
| 3,4-Dihydroxy-5-methoxybenzaldehyde            | MPO    | P05164 | CHEMBL2439    | 0.116739 | 9 / 0   |
| Phytone                                        | MTNR1A | P48039 | CHEMBL1945    | 0.112042 | 156 / 0 |
| Phytone                                        | MTNR1B | P49286 | CHEMBL1946    | 0.112042 | 126 / 0 |
| PubChem CID 21637755                           | MTOR   | P42345 | CHEMBL2842    | 0.079146 | 98 / 0  |
| Chrysin                                        | MYLK   | Q15746 | CHEMBL2428    | 0.119895 | 0 / 1   |
| 5Z-Dodecenyl Acetate                           | NAAA   | Q02083 | CHEMBL4349    | 0.060425 | 30 / 0  |
| Apigenin                                       | NAE1   | Q13564 | CHEMBL2016431 | 0.141522 | 0 / 1   |
| Phytone                                        | NAMPT  | P43490 | CHEMBL1744525 | 0.112042 | 113 / 0 |
| Vanillin                                       | NAT1   | P18440 | CHEMBL5101    | 0.043919 | 3 / 0   |
| Apigenin                                       | NEK2   | P51955 | CHEMBL3835    | 0.108771 | 1 / 2   |
| Apigenin                                       | NEK6   | Q9HC98 | CHEMBL4309    | 0.108771 | 1 / 2   |
| Caffeic acid                                   | NFE2L2 | Q16236 | CHEMBL1075094 | 0.071787 | 0 / 4   |
| Caffeic acid                                   | NGFR   | P08138 | CHEMBL4762    | 0.071787 | 2 / 0   |
| Terpinyl Acetate                               | NLRP3  | Q96P20 | CHEMBL1741208 | 0.031227 | 0 / 1   |

|                                                |        |        |               |          |         |
|------------------------------------------------|--------|--------|---------------|----------|---------|
| 2- Dodecenal                                   | NMT1   | P30419 | CHEMBL2593    | 0.071787 | 2 / 0   |
| 5Z-Dodecenyl Acetate                           | NOD1   | Q9Y239 | CHEMBL1293222 | 0.060425 | 15 / 0  |
| Perillyl acetate                               | NOS1   | P29475 | CHEMBL3568    | 0.031227 | 19 / 0  |
| Carvone Hydrate                                | NOS2   | P35228 | CHEMBL4481    | 0.133391 | 9 / 14  |
| m-alpha-Terpineol, acetate                     | NOS3   | P29474 | CHEMBL4803    | 0.031227 | 5 / 0   |
| Cosmosiine                                     | NOX4   | Q9NPH5 | CHEMBL1250375 | 0.118883 | 1 / 7   |
| Carvone Hydrate                                | NPC1L1 | Q9UHC9 | CHEMBL2027    | 0.150098 | 0 / 15  |
| Phytone                                        | NPY5R  | Q15761 | CHEMBL4561    | 0.112042 | 58 / 0  |
| 1-Carvone                                      | NQO1   | P15559 | CHEMBL3623    | 0.391123 | 1 / 0   |
| Caffeic acid                                   | NQO2   | P16083 | CHEMBL3959    | 0.071787 | 0 / 17  |
| Palmitic Acid                                  | NR0B2  | Q15466 | CHEMBL5603    | 0.053556 | 1 / 0   |
| $\beta$ -sitosterol                            | NR1H2  | P55055 | CHEMBL4093    | 0.106166 | 0 / 1   |
| Carvone Hydrate                                | NR1H3  | Q13133 | CHEMBL2808    | 0.125076 | 0 / 17  |
| (1R,2R,4R)-Trihydroxy-p-menthane               | NR1H4  | Q96RI1 | CHEMBL2047    | 0.08937  | 0 / 12  |
| Carvone Hydrate                                | NR1I2  | O75469 | CHEMBL3401    | 0.125076 | 1 / 0   |
| Carvone Hydrate                                | NR1I3  | Q14994 | CHEMBL5503    | 0.125076 | 0 / 2   |
| Carvone Hydrate                                | NR3C1  | P04150 | CHEMBL2034    | 0.158398 | 0 / 11  |
| Carvone Hydrate                                | NR3C2  | P08235 | CHEMBL1994    | 0.141787 | 0 / 7   |
| Rosmarinic acid ethyl ester                    | NR4A1  | P22736 | CHEMBL1293229 | 0.115737 | 2 / 0   |
| Chrysin                                        | NTRK2  | Q16620 | CHEMBL4898    | 0.198444 | 1 / 1   |
| Kaempferol                                     | NUAK1  | O60285 | CHEMBL5784    | 0.402643 | 1 / 2   |
| 3-Cyclohexene-1-methanol                       | NUDT1  | P36639 | CHEMBL3708265 | 0.031227 | 4 / 0   |
| (+/-)-Eriodictyol                              | ODC1   | P11926 | CHEMBL1869    | 0.097875 | 0 / 5   |
| Phytone                                        | OPRD1  | P41143 | CHEMBL236     | 0.112042 | 5 / 0   |
| Vinyl Amyl Carbinol                            | OPRK1  | P41145 | CHEMBL237     | 0.023833 | 7 / 0   |
| Phytone                                        | OPRM1  | P35372 | CHEMBL233     | 0.112042 | 8 / 0   |
| Phytone                                        | OXTR   | P30559 | CHEMBL2049    | 0.112042 | 138 / 0 |
| Phytone                                        | P2RX7  | Q99572 | CHEMBL4805    | 0.112042 | 104 / 0 |
| Rosmarinic acid                                | PABPC1 | P11940 | CHEMBL1293286 | 0.10934  | 4 / 0   |
| Phytone                                        | PAOX   | Q6QHF9 | CHEMBL2105    | 0.112042 | 0 / 1   |
| Phytone                                        | PARP1  | P09874 | CHEMBL3105    | 0.112042 | 24 / 0  |
| 3,7-Dimethylocta-2,6-dienyl propanoate         | PDE10A | Q9Y233 | CHEMBL4409    | 0.042894 | 62 / 0  |
| 3,7-Dimethylocta-2,6-dienyl propanoate         | PDE4A  | P27815 | CHEMBL254     | 0.042894 | 43 / 0  |
| 2 $\alpha$ ,19 $\alpha$ -Dihydroxyursolic acid | PDE4D  | Q08499 | CHEMBL288     | 0.128067 | 16 / 9  |
| 2 $\alpha$ ,19 $\alpha$ -Dihydroxyursolic acid | PDE5A  | O76074 | CHEMBL1827    | 0.110612 | 8 / 0   |
| 3-Cyclohexene-1-methanol                       | PDE7A  | Q13946 | CHEMBL3012    | 0.031227 | 45 / 0  |
| 3,7-Dimethylocta-2,6-dienyl propanoate         | PDE9A  | O76083 | CHEMBL3535    | 0.042894 | 1 / 0   |
| 5Z-Dodecenyl Acetate                           | PDGFRA | P16234 | CHEMBL2007    | 0.060425 | 35 / 0  |
| Decyl acetate                                  | PDGFRA | P16234 | CHEMBL2095189 | 0.031227 | 10 / 0  |
|                                                | PDGFRB | P09619 |               |          |         |
| 5Z-Dodecenyl Acetate                           | PDGFRB | P09619 | CHEMBL1913    | 0.060425 | 87 / 0  |
| Rosmarinic acid ethyl ester                    | PDK1   | Q15118 | CHEMBL4766    | 0.115737 | 244 / 0 |
| Decanoic acid                                  | PDPK1  | O15530 | CHEMBL2534    | 0.116739 | 2 / 0   |
| 5Z-Dodecenyl Acetate                           | PFKFB3 | Q16875 | CHEMBL2331053 | 0.060425 | 159 / 0 |

|                                                |         |        |               |          |          |
|------------------------------------------------|---------|--------|---------------|----------|----------|
| Rosmarinic acid methyl ester                   | PGD     | P52209 | CHEMBL3404    | 0.113286 | 4 / 0    |
| Amentoflavone                                  | PGF     | P49763 | CHEMBL1697671 | 1        | 1 / 1    |
| Decyl acetate                                  | PGGT1B  | P53609 | CHEMBL2095164 | 0.031227 | 24 / 0   |
|                                                | FNTA    | P49354 |               |          |          |
| Carvone Hydrate                                | PGR     | P06401 | CHEMBL208     | 0.150098 | 120 / 40 |
| Arachic acid                                   | PHF8    | Q9UPP1 | CHEMBL1938212 | 0.127303 | 0 / 1    |
| Caffeic acid                                   | PIK3CA  | P42336 | CHEMBL4005    | 0.071787 | 0 / 1    |
| (1R,2R,4R)-Trihydroxy-p-menthane               | PIK3CA  | P42336 | CHEMBL2111367 | 0.071787 | 1 / 0    |
|                                                | PIK3R1  | P27986 |               |          |          |
| Caffeic acid                                   | PIK3CB  | P42338 | CHEMBL3145    | 0.071787 | 0 / 1    |
| Geranyl acetate                                | PIK3CD  | O00329 | CHEMBL2111432 | 0.031227 | 2 / 0    |
|                                                | PIK3R1  | P27986 |               |          |          |
| Phytone                                        | PIK3CG  | P48736 | CHEMBL3267    | 0.112042 | 64 / 0   |
| Apigenin                                       | PIK3R1  | P27986 | CHEMBL2506    | 0.108771 | 1 / 1    |
| Phytone                                        | PIM1    | P11309 | CHEMBL2147    | 0.112042 | 41 / 0   |
| Phytone                                        | PIM3    | Q86V86 | CHEMBL5407    | 0.112042 | 2 / 0    |
| 5Z-Dodecenyl Acetate                           | PKM     | P14618 | CHEMBL1075189 | 0.060425 | 32 / 0   |
| Apigenin                                       | PKN1    | Q16512 | CHEMBL3384    | 0.108771 | 2 / 3    |
| Arachic acid                                   | PLA2G10 | O15496 | CHEMBL4342    | 0.111502 | 3 / 0    |
| Carvone Hydrate                                | PLA2G1B | P04054 | CHEMBL4426    | 0.125076 | 0 / 1    |
| Chrysin                                        | PLA2G2A | P14555 | CHEMBL3474    | 0.112042 | 3 / 6    |
| 2 $\alpha$ ,19 $\alpha$ -Dihydroxyursolic acid | PLA2G4A | P47712 | CHEMBL3816    | 0.110612 | 6 / 0    |
| (+/-)-Eriodictyol                              | PLA2G5  | P39877 | CHEMBL4323    | 0.097875 | 0 / 3    |
| Terpinyl Acetate                               | PLA2G6  | O60733 | CHEMBL3213    | 0.031227 | 3 / 0    |
| Vanillin                                       | PLAA    | Q9Y263 | CHEMBL6114    | 0.043919 | 10 / 0   |
| Geranyl acetate                                | PLAU    | P00749 | CHEMBL3286    | 0.031227 | 3 / 0    |
| Methyl caffeate                                | PLEC    | Q15149 | CHEMBL1293240 | 0.031227 | 1 / 0    |
| Arachic acid                                   | PLG     | P00747 | CHEMBL1801    | 0.111502 | 0 / 1    |
| Apigenin                                       | PLK1    | P53350 | CHEMBL3024    | 0.125143 | 2 / 3    |
| Methyl caffeate                                | PNP     | P00491 | CHEMBL4338    | 0.031227 | 25 / 0   |
| 5Z-Dodecenyl Acetate                           | PNPLA2  | Q96AD5 | CHEMBL3822353 | 0.060425 | 1 / 0    |
| (1R,2R,4R)-Trihydroxy-p-menthane               | POLA1   | P09884 | CHEMBL1828    | 0.08937  | 0 / 1    |
| Carvone Hydrate                                | POLB    | P06746 | CHEMBL2392    | 0.125076 | 0 / 4    |
| 5Z-Dodecenyl Acetate                           | PON1    | P27169 | CHEMBL3167    | 0.060425 | 1 / 0    |
| 2 $\alpha$ ,19 $\alpha$ -Dihydroxyursolic acid | PPARA   | Q07869 | CHEMBL239     | 0.110612 | 0 / 11   |
| Carvone Hydrate                                | PPARD   | Q03181 | CHEMBL3979    | 0.116739 | 0 / 8    |
| 2 $\alpha$ ,19 $\alpha$ -Dihydroxyursolic acid | PPARG   | P37231 | CHEMBL235     | 0.110612 | 0 / 12   |
| Bodinoside A                                   | PPM1B   | O75688 | CHEMBL2845    | 0.041891 | 0 / 1    |
| Daucosterol                                    | PPP1CC  | P36873 | CHEMBL4438    | 0.074392 | 0 / 1    |
| Bodinoside B                                   | PPP2CA  | P67775 | CHEMBL4703    | 0.057784 | 0 / 5    |
| Bodinoside A                                   | PPP2R5A | Q15172 | CHEMBL4763    | 0.041891 | 0 / 1    |
| 2 $\alpha$ ,19 $\alpha$ -Dihydroxyursolic acid | PREP    | P48147 | CHEMBL3202    | 0.110612 | 0 / 2    |
| Decyl acetate                                  | PRF1    | P14222 | CHEMBL5480    | 0.031227 | 14 / 0   |
| Luteolin 7-(6"-ferulyl)glucoside)              | PRKACA  | P17612 | CHEMBL4101    | 0.055648 | 20 / 0   |



|                                                |          |        |               |          |         |
|------------------------------------------------|----------|--------|---------------|----------|---------|
| Rotungenoside                                  | PRKCA    | P17252 | CHEMBL299     | 0.035898 | 4 / 0   |
| Luteolin 7-(6''-ferulylglucoside)              | PRKCB    | P05771 | CHEMBL3045    | 0.055648 | 107 / 0 |
| Luteolin 7-(6''-ferulylglucoside)              | PRKCD    | Q05655 | CHEMBL2996    | 0.055648 | 94 / 0  |
| Luteolin 7-(6''-ferulylglucoside)              | PRKCE    | Q02156 | CHEMBL3582    | 0.055648 | 91 / 0  |
| Luteolin 7-(6''-ferulylglucoside)              | PRKCG    | P05129 | CHEMBL2938    | 0.055648 | 77 / 0  |
| Carvone Hydrate                                | PRKCH    | P24723 | CHEMBL3616    | 0.125076 | 0 / 1   |
| Chrysin                                        | PRKDC    | P78527 | CHEMBL3142    | 0.119895 | 6 / 0   |
| Geranyl acetate                                | PRSS1    | P07477 | CHEMBL209     | 0.031227 | 8 / 5   |
| Arachic acid                                   | PSEN1    | P49768 | CHEMBL2473    | 0.111502 | 7 / 0   |
|                                                | PSEN2    | P49810 |               |          |         |
|                                                | PSENEN   | Q9NZ42 |               |          |         |
| Carvone Hydrate                                | NCSTN    | Q92542 | CHEMBL2094135 | 0.116739 | 14 / 0  |
|                                                | APH1A    | Q96BI3 |               |          |         |
|                                                | PSEN1    | P49768 |               |          |         |
|                                                | APH1B    | Q8WW43 |               |          |         |
| Phytone                                        | PTAFR    | P25105 | CHEMBL250     | 0.112042 | 10 / 0  |
| 2 $\alpha$ ,19 $\alpha$ -Dihydroxyursolic acid | PTGDR    | Q13258 | CHEMBL4427    | 0.110612 | 56 / 0  |
| 2 $\alpha$ ,19 $\alpha$ -Dihydroxyursolic acid | PTGDR2   | Q9Y5Y4 | CHEMBL5071    | 0.110612 | 338 / 0 |
| 2 $\alpha$ ,19 $\alpha$ -Dihydroxyursolic acid | PTGER1   | P34995 | CHEMBL1811    | 0.110612 | 28 / 14 |
| 2 $\alpha$ ,19 $\alpha$ -Dihydroxyursolic acid | PTGER2   | P43116 | CHEMBL1881    | 0.110612 | 22 / 5  |
| Coleonolic acid                                | PTGER3   | P43115 | CHEMBL3710    | 0.120226 | 29 / 3  |
| 2 $\alpha$ ,19 $\alpha$ -Dihydroxyursolic acid | PTGER4   | P35408 | CHEMBL1836    | 0.110612 | 87 / 11 |
| Carvone Hydrate                                | PTGES    | O14684 | CHEMBL5658    | 0.125076 | 1 / 12  |
| 2 $\alpha$ ,19 $\alpha$ -Dihydroxyursolic acid | PTGFR    | P43088 | CHEMBL1987    | 0.110612 | 1 / 1   |
| 2 $\alpha$ ,19 $\alpha$ -Dihydroxyursolic acid | PTGIR    | P43119 | CHEMBL1995    | 0.110612 | 6 / 9   |
| Caffeic acid                                   | PTGS1    | P23219 | CHEMBL221     | 0.071787 | 6 / 19  |
| Carvone Hydrate                                | PTGS2    | P35354 | CHEMBL230     | 0.116739 | 108 / 7 |
| Apigenin                                       | PTK2     | Q05397 | CHEMBL2695    | 0.108771 | 1 / 2   |
| 5Z-Dodecenyl Acetate                           | PTK2B    | Q14289 | CHEMBL5469    | 0.060425 | 21 / 0  |
| 5Z-Dodecenyl Acetate                           | PTK6     | Q13882 | CHEMBL4601    | 0.060425 | 20 / 0  |
| PubChem CID 21637755                           | PTPA     | Q15257 | CHEMBL2505    | 0.079146 | 0 / 3   |
| Caffeic acid                                   | PTPN1    | P18031 | CHEMBL335     | 0.729303 | 0 / 24  |
| Carvone Hydrate                                | PTPN11   | Q06124 | CHEMBL3864    | 0.166646 | 0 / 1   |
| Carvone Hydrate                                | PTPN2    | P17706 | CHEMBL3807    | 0.141787 | 0 / 15  |
| Carvone Hydrate                                | PTPN6    | P29350 | CHEMBL3166    | 0.125076 | 0 / 1   |
| Arachic acid                                   | PTPRC    | P08575 | CHEMBL3243    | 0.111502 | 21 / 0  |
| Carvone Hydrate                                | PTPRF    | P10586 | CHEMBL3521    | 0.125076 | 2 / 0   |
| Apigenin                                       | PTPRS    | Q13332 | CHEMBL2396508 | 0.411906 | 4 / 8   |
| Rosmarinic acid ethyl ester                    | PTPsigma | Q9UM81 | CHEMBL2146342 | 0.115737 | 2 / 0   |
| Apigenin                                       | PYGL     | P06737 | CHEMBL2568    | 0.108771 | 1 / 1   |
| 5Z-Dodecenyl Acetate                           | QPCT     | Q16769 | CHEMBL4508    | 0.060425 | 13 / 0  |
| Rosmarinic acid ethyl ester                    | RAF1     | P04049 | CHEMBL1906    | 0.115737 | 8 / 0   |
| 2- Dodecenal                                   | RAPGEF4  | Q8WZA2 | CHEMBL2029198 | 0.071787 | 3 / 0   |
| Palmitic Acid                                  | RARA     | P10276 | CHEMBL2055    | 0.053556 | 19 / 0  |

|                                                |           |                  |               |          |         |
|------------------------------------------------|-----------|------------------|---------------|----------|---------|
| Palmitic Acid                                  | RARB      | P10826           | CHEMBL2008    | 0.053556 | 135 / 0 |
| Palmitic Acid                                  | RARG      | P13631           | CHEMBL2003    | 0.053556 | 129 / 0 |
| Carvone Hydrate                                | RASGRP3   | Q8IV61           | CHEMBL3638    | 0.116739 | 0 / 1   |
| Daucosterol                                    | RBP4      | P02753           | CHEMBL3100    | 0.074392 | 2 / 0   |
| 2- Dodecenal                                   | RELA      | Q04206           | CHEMBL5533    | 0.071787 | 1 / 0   |
| 5Z-Dodecenyl Acetate                           | RET       | P07949           | CHEMBL2041    | 0.060425 | 37 / 0  |
| Methyl caffeate                                | RNASEH1   | O60930           | CHEMBL5893    | 0.031227 | 1 / 0   |
| Carvone Hydrate                                | RORA      | P35398           | CHEMBL5868    | 0.133391 | 0 / 2   |
| Palmitic Acid                                  | RORB      | Q92753           | CHEMBL3091268 | 0.053556 | 1 / 0   |
| 2 $\alpha$ ,19 $\alpha$ -Dihydroxyursolic acid | RORC      | P51449           | CHEMBL1741186 | 0.128067 | 0 / 10  |
| Cosmosiine                                     | RPS6KA3   | P51812           | CHEMBL2345    | 0.118883 | 0 / 19  |
| Rosmarinic acid ethyl ester                    | RPS6KB1   | P23443           | CHEMBL4501    | 0.115737 | 179 / 0 |
| (+/-)-Eriodictyol                              | RXRA      | P19793           | CHEMBL2061    | 0.097875 | 210 / 0 |
| Palmitic Acid                                  | RXRB      | P28702           | CHEMBL1870    | 0.053556 | 69 / 0  |
| Coleonolic acid                                | RXRG      | P48443           | CHEMBL2004    | 0.120226 | 20 / 0  |
| Daucosterol                                    | S1PR1     | P21453           | CHEMBL4333    | 0.074392 | 129 / 0 |
| Coleonolic acid                                | S1PR2     | O95136           | CHEMBL2955    | 0.120226 | 20 / 0  |
| Phytone                                        | S1PR3     | Q99500           | CHEMBL3892    | 0.112042 | 101 / 0 |
| Daucosterol                                    | S1PR4     | O95977           | CHEMBL3230    | 0.074392 | 14 / 0  |
| Daucosterol                                    | S1PR5     | Q9H228           | CHEMBL2274    | 0.074392 | 3 / 0   |
| Arachic acid                                   | SAE1 UBA2 | Q9UBE0<br>Q9UBT2 | CHEMBL2095174 | 0.111502 | 0 / 1   |
| Carvone Hydrate                                | SCD       | O00767           | CHEMBL5555    | 0.125076 | 0 / 1   |
| 5Z-Dodecenyl Acetate                           | SCN4A     | P35499           | CHEMBL2072    | 0.060425 | 8 / 0   |
| Linalool                                       | SCN5A     | Q14524           | CHEMBL1980    | 0.043919 | 3 / 0   |
| 5Z-Dodecenyl Acetate                           | SCN9A     | Q15858           | CHEMBL4296    | 0.060425 | 17 / 0  |
| Rosmarinic acid                                | SELE      | P16581           | CHEMBL3890    | 0.10934  | 11 / 0  |
| Rosmarinic acid                                | SELL      | P14151           | CHEMBL3161    | 0.10934  | 11 / 0  |
| Rosmarinic acid                                | SELP      | P16109           | CHEMBL5378    | 0.10934  | 17 / 0  |
| Carvone Hydrate                                | SERPINA6  | P08185           | CHEMBL2421    | 0.125076 | 0 / 19  |
| Coleonolic acid                                | SERPINE1  | P05121           | CHEMBL3475    | 0.120226 | 12 / 0  |
| Rosmarinic acid methyl ester                   | SFRP1     | Q8N474           | CHEMBL5517    | 0.113286 | 1 / 0   |
| Rosmarinic acid methyl ester                   | SGK1      | O00141           | CHEMBL2343    | 0.113286 | 5 / 0   |
| Carvone Hydrate                                | SHBG      | P04278           | CHEMBL3305    | 0.125076 | 0 / 33  |
| (1R,2R,4R)-Trihydroxy-p-menthane               | SHH       | Q15465           | CHEMBL5602    | 0.08937  | 0 / 10  |
| Carvone Hydrate                                | SIGMAR1   | Q99720           | CHEMBL287     | 0.191772 | 18 / 4  |
| Decyl acetate                                  | SIRT2     | Q8IXJ6           | CHEMBL4462    | 0.031227 | 7 / 0   |
| Palmitic Acid                                  | SLC16A1   | P53985           | CHEMBL4360    | 0.053556 | 13 / 0  |
| 2- Dodecenal                                   | SLC18A3   | Q16572           | CHEMBL4767    | 0.071787 | 1 / 0   |
| Apigenin                                       | SLC22A12  | Q96537           | CHEMBL6120    | 0.116965 | 68 / 0  |
| 2 $\alpha$ ,19 $\alpha$ -Dihydroxyursolic acid | SLC22A6   | Q4U2R8           | CHEMBL1641347 | 0.110612 | 2 / 2   |
| CAS 1038743-23-5                               | SLC28A2   | O43868           | CHEMBL5780    | 0.055648 | 16 / 0  |
| Miscanthoside                                  | SLC28A3   | Q9HAS3           | CHEMBL5707    | 0.106543 | 1 / 1   |
| Cosmosiine                                     | SLC29A1   | Q99808           | CHEMBL1997    | 0.118883 | 2 / 0   |

|                                                |         |        |               |          |          |
|------------------------------------------------|---------|--------|---------------|----------|----------|
| CAS 1038743-23-5                               | SLC5A1  | P13866 | CHEMBL4979    | 0.055648 | 51 / 23  |
| CAS 1038743-23-5                               | SLC5A2  | P31639 | CHEMBL3884    | 0.055648 | 102 / 30 |
| Miscanthoside                                  | SLC5A4  | Q9NY91 | CHEMBL1770047 | 0.106543 | 1 / 12   |
| Caffeic acid                                   | SLC6A2  | P23975 | CHEMBL222     | 0.071787 | 0 / 1    |
| Carvone Hydrate                                | SLC6A3  | Q01959 | CHEMBL238     | 0.133391 | 77 / 2   |
| 2 $\alpha$ ,19 $\alpha$ -Dihydroxyursolic acid | SLC6A4  | P31645 | CHEMBL228     | 0.110612 | 0 / 1    |
| 5Z-Dodecenyl Acetate                           | SLC9A1  | P19634 | CHEMBL2781    | 0.060425 | 31 / 0   |
| Gallocatechol                                  | SNCA    | P37840 | CHEMBL6152    | 0.101614 | 12 / 0   |
| Myrtenol                                       | SPHK1   | Q9NYA1 | CHEMBL4394    | 0.043919 | 0 / 2    |
| 2- Dodecenal                                   | SPHK2   | Q9NRA0 | CHEMBL3023    | 0.071787 | 0 / 1    |
| Gallic acid                                    | SQLE    | Q14534 | CHEMBL3592    | 0.150098 | 1 / 0    |
| Gallocatechol                                  | SRC     | P12931 | CHEMBL267     | 0.101614 | 5 / 8    |
| Carvone Hydrate                                | SRD5A1  | P18405 | CHEMBL1787    | 0.125076 | 39 / 0   |
| Carvone Hydrate                                | SRD5A2  | P31213 | CHEMBL1856    | 0.125076 | 0 / 19   |
| $\beta$ -sitosterol                            | SREBF2  | Q12772 | CHEMBL1795166 | 0.17281  | 0 / 1    |
| (+/-)-Eriodictyol                              | ST3GAL3 | Q11203 | CHEMBL3596076 | 0.097875 | 0 / 1    |
| Apigenin                                       | ST6GAL1 | P15907 | CHEMBL3596075 | 0.108771 | 0 / 2    |
| Caffeic acid                                   | STAT3   | P40763 | CHEMBL4026    | 0.071787 | 0 / 1    |
| Caffeic acid                                   | SYK     | P43405 | CHEMBL2599    | 0.071787 | 0 / 1    |
| 5Z-Dodecenyl Acetate                           | TAAR1   | Q96RJ0 | CHEMBL5857    | 0.060425 | 0 / 8    |
| Phytone                                        | TACR1   | P25103 | CHEMBL249     | 0.112042 | 152 / 0  |
| Phytone                                        | TAOK3   | Q9H2K8 | CHEMBL5701    | 0.112042 | 16 / 0   |
| 5Z-Dodecenyl Acetate                           | TAS2R31 | P59538 | CHEMBL2034804 | 0.060425 | 0 / 1    |
| Decyl acetate                                  | TBXA2R  | P21731 | CHEMBL2069    | 0.031227 | 96 / 0   |
| Apigenin                                       | TBXAS1  | P24557 | CHEMBL1835    | 0.141522 | 27 / 0   |
| 3,7-Dimethylocta-2,6-dienyl propanoate         | TDO2    | P48775 | CHEMBL2140    | 0.042894 | 21 / 0   |
| 2 $\alpha$ ,19 $\alpha$ -Dihydroxyursolic acid | TERT    | O14746 | CHEMBL2916    | 0.110612 | 1 / 3    |
| Terpinyl Acetate                               | TGFBR1  | P36897 | CHEMBL4439    | 0.031227 | 2 / 0    |
| 2- Dodecenal                                   | TGM2    | P21980 | CHEMBL2730    | 0.071787 | 18 / 0   |
| Coleonolic acid                                | THRA    | P10827 | CHEMBL1860    | 0.120226 | 15 / 0   |
| Coleonolic acid                                | THRB    | P10828 | CHEMBL1947    | 0.120226 | 18 / 0   |
| Caffeic acid                                   | TLR4    | O00206 | CHEMBL5255    | 0.071787 | 2 / 21   |
| Geranyl acetate                                | TMIGD3  | P0DMS9 | CHEMBL3712907 | 0.031227 | 6 / 0    |
| Carvone Hydrate                                | TNF     | P01375 | CHEMBL1825    | 0.125076 | 0 / 8    |
| Rosmarinic acid methyl ester                   | TNKS    | O95271 | CHEMBL6164    | 0.113286 | 11 / 0   |
| Rosmarinic acid methyl ester                   | TNKS2   | Q9H2K2 | CHEMBL6154    | 0.113286 | 30 / 0   |
|                                                | TNNC1   | P63316 |               |          |          |
| Linalool                                       | TNNT2   | P45379 | CHEMBL2095202 | 0.043919 | 2 / 0    |
|                                                | TNNI3   | P19429 |               |          |          |
| Carvone Hydrate                                | TOP1    | P11387 | CHEMBL1781    | 0.125076 | 0 / 2    |
| Oleanolic acid                                 | TOP2A   | P11388 | CHEMBL1806    | 0.100634 | 1 / 2    |
| Coleonolic acid                                | TP53    | P04637 | CHEMBL4096    | 0.120226 | 4 / 0    |
| Caffeic acid                                   | TPMT    | P51580 | CHEMBL2500    | 0.071787 | 4 / 0    |
| 3,7-Dimethylocta-2,6-dienyl propanoate         | TRPA1   | O75762 | CHEMBL6007    | 0.042894 | 1 / 2    |

|                                     |        |        |               |          |         |
|-------------------------------------|--------|--------|---------------|----------|---------|
| Phytone                             | TRPM8  | Q7Z2W7 | CHEMBL1075319 | 0.112042 | 1 / 0   |
| beta-Caryophyllene                  | TRPV1  | Q8NER1 | CHEMBL4794    | 0.042894 | 0 / 2   |
| Vinyl Amyl Carbinol                 | TRPV3  | Q8NET8 | CHEMBL5522    | 0.044308 | 1 / 0   |
| Phytone                             | TSPO   | P30536 | CHEMBL5742    | 0.112042 | 214 / 0 |
| Perillyl acetate                    | TTL    | Q8NG68 | CHEMBL5549    | 0.031227 | 0 / 12  |
| 3,4-Dihydroxy-5-methoxybenzaldehyde | TTR    | P02766 | CHEMBL3194    | 0.133391 | 3 / 5   |
| Geranyl acetate                     | TUBB1  | Q9H4B7 | CHEMBL1915    | 0.031227 | 10 / 0  |
| Vinyl Amyl Carbinol                 | TYK2   | P29597 | CHEMBL3553    | 0.023833 | 24 / 0  |
| Icariside E4                        | TYMS   | P04818 | CHEMBL1952    | 0.103187 | 5 / 0   |
| Protocatechualdehyde                | TYR    | P14679 | CHEMBL1973    | 0.044308 | 0 / 1   |
| Rotungenoside                       | TYRO3  | Q06418 | CHEMBL5314    | 0.035898 | 26 / 0  |
| (1R,2R,4R)-Trihydroxy-p-menthane    | UGT2B7 | P16662 | CHEMBL4370    | 0.08057  | 0 / 20  |
| Perillyl acetate                    | USP10  | Q14694 | CHEMBL3407323 | 0.031227 | 1 / 0   |
| Perillyl acetate                    | USP13  | Q92995 | CHEMBL3407324 | 0.031227 | 1 / 0   |
| 5Z-Dodecenyl Acetate                | VCAM1  | P19320 | CHEMBL3735    | 0.060425 | 19 / 0  |
| Amentoflavone                       | VCP    | P55072 | CHEMBL1075145 | 1        | 1 / 1   |
| Arachic acid                        | VDR    | P11473 | CHEMBL1977    | 0.150982 | 0 / 2   |
| Amentoflavone                       | VEGFA  | P15692 | CHEMBL1783    | 1        | 1 / 1   |
| Rosmarinic acid ethyl ester         | WEE1   | P30291 | CHEMBL5491    | 0.115737 | 54 / 0  |
| Cosmosiine                          | XDH    | P47989 | CHEMBL1929    | 0.118883 | 3 / 19  |
| Terpinyl Acetate                    | XPO1   | O14980 | CHEMBL5661    | 0.031227 | 2 / 0   |
| Galocatechol                        | YWHAG  | P61981 | CHEMBL1293296 | 0.101614 | 1 / 0   |

**Table S3.** Summary of ALL-Gene Associations. In DisGeNET database, 93 ALI-related genes were obtained.

| Disease           | Gene    | UniProt       | DSI_g | DPI_g | Score_gda | First_Ref | Last_Ref |
|-------------------|---------|---------------|-------|-------|-----------|-----------|----------|
| Acute Lung Injury | VIP     | P01282        | 0.437 | 0.846 | 0.5       | 1996      | 2010     |
| Acute Lung Injury | CXCL2   | P19875        | 0.513 | 0.885 | 0.5       | 2009      | 2016     |
| Acute Lung Injury | PPARG   | P37231        | 0.358 | 0.885 | 0.5       | 2006      | 2011     |
| Acute Lung Injury | ICAM1   | P05362        | 0.364 | 0.962 | 0.5       | 2007      | 2016     |
| Acute Lung Injury | TGFB1   | P01137        | 0.287 | 0.962 | 0.3       | 2005      | 2005     |
| Acute Lung Injury | APOA1   | P02647        | 0.429 | 0.885 | 0.3       | 2011      | 2011     |
| Acute Lung Injury | TFF2    | Q03403        | 0.61  | 0.538 | 0.3       | 2010      | 2010     |
| Acute Lung Injury | FAS     | P25445        | 0.372 | 0.923 | 0.3       | 2000      | 2000     |
| Acute Lung Injury | TFF1    | P04155        | 0.529 | 0.769 | 0.3       | 2010      | 2010     |
| Acute Lung Injury | FASLG   | P48023        | 0.43  | 0.885 | 0.3       | 2000      | 2000     |
| Acute Lung Injury | SFTPD   | P35247        | 0.5   | 0.846 | 0.3       | 2018      | 2018     |
| Acute Lung Injury | IL17A   | Q16552        | 0.324 | 0.923 | 0.3       | 2017      | 2017     |
| Acute Lung Injury | ASCL1   | P50553        | 0.552 | 0.692 | 0.3       | 2010      | 2010     |
| Acute Lung Injury | MYLK    | Q15746        | 0.51  | 0.846 | 0.3       | 2009      | 2009     |
| Acute Lung Injury | NFE2L2  | Q16236        | 0.357 | 0.885 | 0.3       | 2015      | 2015     |
| Acute Lung Injury | TNFAIP6 | P98066        | 0.582 | 0.731 | 0.3       | 2016      | 2016     |
| Acute Lung Injury | TXN     | P10599        | 0.447 | 0.885 | 0.3       | 2005      | 2005     |
| Acute Lung Injury | EPHX1   | P07099        | 0.5   | 0.846 | 0.3       | 2016      | 2016     |
| Acute Lung Injury | EDN1    | P05305        | 0.38  | 0.846 | 0.3       | 2006      | 2006     |
| Acute Lung Injury | IL1RL1  | Q01638        | 0.547 | 0.731 | 0.3       | 2011      | 2011     |
| Acute Lung Injury | CAT     | P04040        | 0.359 | 0.962 | 0.3       | 2004      | 2004     |
| Acute Lung Injury | ACVR1   | Q04771        | 0.535 | 0.731 | 0.3       | 2011      | 2011     |
| Acute Lung Injury | IL1B    | P01584        | 0.276 | 0.962 | 0.21      | 1996      | 2012     |
| Acute Lung Injury | PLAU    | P00749        | 0.425 | 0.923 | 0.21      | 2008      | 2013     |
| Acute Lung Injury | BAX     | Q07812        | 0.417 | 0.885 | 0.2       | 2010      | 2010     |
| Acute Lung Injury | BCL2    | P10415        | 0.291 | 0.885 | 0.2       | 2010      | 2010     |
| Acute Lung Injury | CCL2    | P13500        | 0.321 | 0.962 | 0.2       | 2012      | 2012     |
| Acute Lung Injury | C3      | P01024        | 0.445 | 0.885 | 0.2       | 2012      | 2012     |
| Acute Lung Injury | FADD    | Q13158        | 0.537 | 0.846 | 0.2       | 2013      | 2013     |
| Acute Lung Injury | PTGS2   | P35354        | 0.314 | 0.962 | 0.2       | 2009      | 2009     |
| Acute Lung Injury | MFN1    | Q8IWA4        | 0.644 | 0.577 | 0.2       | 2015      | 2015     |
| Acute Lung Injury | IL13    | P35225        | 0.386 | 0.846 | 0.2       | 2004      | 2004     |
| Acute Lung Injury | PLA2G2A | P14555        | 0.488 | 0.808 | 0.2       | 2009      | 2009     |
| Acute Lung Injury | AKAP12  | Q02952        | 0.566 | 0.615 | 0.2       | 2013      | 2013     |
| Acute Lung Injury | PECAM1  | P16284        | 0.426 | 0.846 | 0.2       | 2012      | 2012     |
| Acute Lung Injury | PAWR    | Q96IZ0        | 0.542 | 0.846 | 0.2       | 2007      | 2007     |
| Acute Lung Injury | CCL4    | P13236;Q8NHW4 | 0.466 | 0.923 | 0.2       | 2000      | 2012     |
| Acute Lung Injury | CXCL6   | P80162        | 0.582 | 0.692 | 0.2       | 1995      | 1995     |
| Acute Lung Injury | CAV1    | Q03135        | 0.388 | 0.885 | 0.2       | 2014      | 2014     |
| Acute Lung Injury | TNF     | P01375        | 0.231 | 0.962 | 0.2       | 2000      | 2012     |
| Acute Lung Injury | TLR4    | O00206        | 0.321 | 0.962 | 0.2       | 2009      | 2009     |
| Acute Lung Injury | SCGB1A1 | P11684        | 0.546 | 0.808 | 0.2       | 2008      | 2008     |

|                   |          |        |       |       |     |      |      |
|-------------------|----------|--------|-------|-------|-----|------|------|
| Acute Lung Injury | TIMP2    | P16035 | 0.425 | 0.846 | 0.2 | 1999 | 1999 |
| Acute Lung Injury | THBD     | P07204 | 0.457 | 0.769 | 0.2 | 2009 | 2009 |
| Acute Lung Injury | VEGFA    | P15692 | 0.266 | 0.923 | 0.2 | 2012 | 2012 |
| Acute Lung Injury | MFN2     | O95140 | 0.471 | 0.846 | 0.2 | 2015 | 2015 |
| Acute Lung Injury | XDH      | P47989 | 0.529 | 0.846 | 0.2 | 1998 | 1998 |
| Acute Lung Injury | CASP3    | P42574 | 0.351 | 0.923 | 0.2 | 2018 | 2018 |
| Acute Lung Injury | CASP8    | Q14790 | 0.404 | 0.923 | 0.2 | 2018 | 2018 |
| Acute Lung Injury | SLPI     | P03973 | 0.449 | 0.846 | 0.2 | 1999 | 2015 |
| Acute Lung Injury | P2RY12   | Q9H244 | 0.533 | 0.731 | 0.2 | 2011 | 2011 |
| Acute Lung Injury | NOD2     | Q9HC29 | 0.423 | 0.923 | 0.2 | 2012 | 2012 |
| Acute Lung Injury | PAK1     | Q13153 | 0.494 | 0.808 | 0.2 | 2013 | 2013 |
| Acute Lung Injury | SERPINE1 | P05121 | 0.359 | 0.885 | 0.2 | 2000 | 2015 |
| Acute Lung Injury | FCGR1A   | P12314 | 0.532 | 0.731 | 0.2 | 2009 | 2009 |
| Acute Lung Injury | FCGR2A   | P12318 | 0.48  | 0.769 | 0.2 | 2009 | 2009 |
| Acute Lung Injury | FCGR2B   | P31994 | 0.522 | 0.846 | 0.2 | 2009 | 2009 |
| Acute Lung Injury | FGA      | P02671 | 0.573 | 0.769 | 0.2 | 2012 | 2012 |
| Acute Lung Injury | FLT1     | P17948 | 0.419 | 0.846 | 0.2 | 2012 | 2012 |
| Acute Lung Injury | GJA1     | P17302 | 0.393 | 0.885 | 0.2 | 2013 | 2013 |
| Acute Lung Injury | GOT1     | P17174 | 0.601 | 0.692 | 0.2 | 2015 | 2015 |
| Acute Lung Injury | GSR      | P00390 | 0.494 | 0.846 | 0.2 | 1994 | 1994 |
| Acute Lung Injury | F3       | P13726 | 0.415 | 0.846 | 0.2 | 2012 | 2012 |
| Acute Lung Injury | F2       | P00734 | 0.415 | 0.885 | 0.2 | 2012 | 2012 |
| Acute Lung Injury | PROCR    | Q9UNN8 | 0.56  | 0.692 | 0.2 | 2009 | 2009 |
| Acute Lung Injury | ADRA2A   | P08913 | 0.578 | 0.615 | 0.2 | 2011 | 2011 |
| Acute Lung Injury | CYP1A1   | P04798 | 0.436 | 0.846 | 0.2 | 2006 | 2006 |
| Acute Lung Injury | NQO1     | P15559 | 0.434 | 0.885 | 0.2 | 2014 | 2016 |
| Acute Lung Injury | AGER     | Q15109 | 0.42  | 0.885 | 0.2 | 2013 | 2013 |
| Acute Lung Injury | ELANE    | P08246 | 0.447 | 0.846 | 0.2 | 2004 | 2008 |
| Acute Lung Injury | EPHX2    | P34913 | 0.568 | 0.654 | 0.2 | 2012 | 2012 |
| Acute Lung Injury | ALB      | P02768 | 0.317 | 0.962 | 0.2 | 2012 | 2012 |
| Acute Lung Injury | HMGB1    | P09429 | 0.368 | 0.923 | 0.2 | 2011 | 2013 |
| Acute Lung Injury | HMOX1    | P09601 | 0.381 | 0.923 | 0.2 | 2010 | 2011 |
| Acute Lung Injury | OPA1     | O60313 | 0.51  | 0.846 | 0.2 | 2015 | 2015 |
| Acute Lung Injury | NOS2     | P35228 | 0.364 | 0.923 | 0.2 | 2006 | 2006 |
| Acute Lung Injury | MIR330   |        | 0.584 | 0.692 | 0.2 | 2014 | 2014 |
| Acute Lung Injury | MMP9     | P14780 | 0.305 | 0.923 | 0.2 | 2012 | 2012 |
| Acute Lung Injury | MMP7     | P09237 | 0.446 | 0.885 | 0.2 | 2011 | 2011 |
| Acute Lung Injury | MMP2     | P08253 | 0.333 | 0.923 | 0.2 | 2012 | 2012 |
| Acute Lung Injury | MIR96    |        | 0.536 | 0.769 | 0.2 | 2014 | 2014 |
| Acute Lung Injury | KDR      | P35968 | 0.378 | 0.885 | 0.2 | 2012 | 2012 |
| Acute Lung Injury | ITGB2    | P05107 | 0.444 | 0.923 | 0.2 | 1992 | 1992 |
| Acute Lung Injury | AQP5     | P55064 | 0.552 | 0.769 | 0.2 | 2014 | 2014 |
| Acute Lung Injury | IFNG     | P01579 | 0.288 | 0.962 | 0.2 | 2012 | 2012 |
| Acute Lung Injury | IL1RN    | P18510 | 0.373 | 0.923 | 0.2 | 1996 | 2005 |

|                   |       |        |       |       |      |      |      |
|-------------------|-------|--------|-------|-------|------|------|------|
| Acute Lung Injury | IL2   | P60568 | 0.336 | 0.885 | 0.2  | 2012 | 2012 |
| Acute Lung Injury | IL4   | P05112 | 0.332 | 0.962 | 0.2  | 2014 | 2014 |
| Acute Lung Injury | IL6   | P05231 | 0.248 | 0.962 | 0.2  | 2009 | 2009 |
| Acute Lung Injury | IL10  | P22301 | 0.281 | 0.923 | 0.2  | 2013 | 2013 |
| Acute Lung Injury | IL18  | Q14116 | 0.365 | 0.923 | 0.2  | 2013 | 2013 |
| Acute Lung Injury | ADAR  | P55265 | 0.501 | 0.808 | 0.2  | 2009 | 2009 |
| Acute Lung Injury | MST1R | Q04912 | 0.542 | 0.808 | 0.01 | 2006 | 2006 |

---
